# Supplementary material
Source: Research Square preprint supplement (doi:10.21203/rs.3.rs-9252807/v1)
Supplement: Supplementary file 1 [file b45df58ad8d65ba580b12b6c.doc]

**Supplementary information for**

**Precursor-encoded supramolecular topology governs metal-humic stability**

Yu Li a, c, Mengxin Wu d, Shuang Ai b, c, Meiling Zhang b, Xianghui Meng b, c, Jianghao Cheng b, c, Liu Cui d*, Fan Yang a, c*, Kui Cheng b, c[[1]](#footnote-2)

a School of Water Conservancy and Civil Engineering, Northeast Agricultural University, Harbin, China.

b College of Engineering, Northeast Agricultural University, Harbin, China.

c International Cooperation Joint Laboratory of Health in Cold Region Black Soil Habitat of the Ministry of Education, China.

d School of Energy, Power and Mechanical Engineering, North China Electric Power University, Beijing, China.

**This PDF file includes:**

Supplementary Methods 1-8

Supplementary Figures 1-11

Supplementary Tables 1-10

Supplementary References

**Supplementary Method 1. Detection Conditions for EEMs**

All sample solutions were maintained at pH 7.0 by phosphate buffer solution, and then filtered through a 0.45 μm membrane before EEM detection. The absorbance was monitored by a UV-Vis spectrophotometer (Genesys 10S, USA) with 1.0 cm optical path quartz cuvette, and the scanning range was set to 200-800 nm. Fluorescence excitation-emission matrices (EEMs) of samples were measured using a fluorescence spectrophotometer (F-7000, Japan). The excitation (Ex) and emission (Em) wavelengths were set at 220-450 nm and 280-550 nm with 5 nm intervals, respectively. Based on the 3D-EEM (excitation-emission matrix) spectroscopy results, parallel factor analysis (PARAFAC) was conducted using MATLAB 2016 with the DOMFluor toolbox ([http://www.models.lif.ku.dk](http://www.models.lif.ku.dk/)) to characterize dissolved organic matter (DOM) fluorescence1. The analytical procedure involved truncating scattering-affected wavelengths using the CutData function, followed by exploratory data analysis and outlier identification. All qualified data were subsequently incorporated into the modeling process to identify distinct DOM fluorescent components. The relative contribution of each component to the total fluorescence intensity was then determined based on their specific fluorescence intensities, emission loadings, and excitation loadings.

**Supplementary Method 2. SPE-FT-MS experiments**

Solid phase extraction (SPE) was performed prior to FT-MS analysis using solid phase

extraction columns (HyperSepTM retain PEP 60 mg, Thermo scientific). This column provides balanced retention of polar and non-polar analytes. When preparing biological samples prior to SPE: 1) Centrifuge and filter samples to remove any solid contamination; 2) Dilute biological sample with water containing 2% formic acid to a ratio 1:1 (v/v). According to the manufacturer’s guidelines, the specific procedure is slightly modified as follows: (1) the SPE columns were first conditioned using 10 mL methanol (suitable for HPLC, Sigma-Aldrich) followed by 10 mL deionized water; (2) the filtered samples (4 mL) were loaded at a rate of 2-5 mL/min; (3) the columns were washed using 4 mL 5% methanol-deionized water; (4) Elute the columns with 4 mL methanol to clean tubes. The extraction efficiencies for all samples were calculated by measuring the TOC concentration before and after extraction, resulting in an average of 49 ± 4% (n = 7). The DOM eluates were kept in acid-washed and combusted amber glass vials at -20°C until they were ready for analysis on an FT-ICR-MS (Bruker Daltonics, Solarix XR, America) spectrometer with negative mode electrospray ionization.

**Supplementary Method 3. FT-ICR MS data analysis**

The raw spectral data were processed using Data Analysis software (v5.2, Bruker Daltonics, CA), extracting m/z values with a signal-to-noise (S/N) threshold exceeding 7. Experimental mass measurements were internally calibrated using reference compounds listed in Table S11 before molecular formula determination. Putative chemical formulas were derived using the Compound Identification Algorithm (CIA) implemented in the Formularity software. Assignments were constrained to a mass accuracy of ≤ 0.5 ppm within the m/z range of 100–1000. Following established guidelines (golden rules)4, we considered only C, H, O, N, and S in formula assignments. To enhance reliability, preference was given to formulas with minimal heteroatoms (N, S) and the smallest mass error5. A summary of formula assignments is provided in Table S19. Assigned formulas were grouped into four elemental categories: CHO, CHON, CHOS, and CHONS. Additionally, biochemical classifications-including lipids (LP), proteins/amino sugars (PA), carbohydrates (CH), unsaturated hydrocarbons (UH), lignin (LG), tannins (TN), condensed aromatics (CA), and unclassified compounds ("other")-were assigned based on predefined H:C and O:C ratios (Table S2). These classifications serve as preliminary groupings for data interpretation rather than definitive structural identifications, as MS/MS validation was not performed.

Given the structural complexity of HA, computational approaches were employed for characterization. The modified aromaticity index (AImod)6 was calculated to estimate aromaticity: AImod = (1 + C-0.5*O-S-0.5*(N+H))/(C-0.5*O-N-S), where C, H, O, N, and S denote atom counts in each formula. The double bond equivalent (DBE) was computed as: DBE = 1+C-0.5*H+0.5*N. To assess single C-C bonds, we used the C-1-DBE index, acknowledging potential underestimation due to undifferentiated non-C-C double bonds (e.g., C=O, C=N). The nominal oxidation state of carbon (NOSC)7 of each organic molecule was calculated using the following equation: NOSC = -H/C + 2*O/C + 3*N/C + 2*S/C. Gibbs free energy of a given organic compound can be computed as the standard molar enthalpy of its complete combustion (ΔH). ΔH values are calculated based on the Patel-Erickson equation8, 9, where the standard molar enthalpy of combustion of organic matter is proportional to the number of electrons that it transfers to oxygen during combustion. This proportionality is expressed through the equation10 : ΔH = -114.14*(4*C+H-2*O-0*N+6*S)/C. Functional group transformations (e.g., oxygenation, decarboxylation, dealkylation, deamination, desulfonation) between BDOM and BDOM-Cd samples were quantified. These computations were performed using R.

**Supplementary Method 4. 2D-COS Analysis**

In this study, on the basis of Noda's and Ozaki's work11, the two- dimensional correlation analysis was carried out by using the 3D-EEM spectra collected over time. The 2D-COS computation was performed by 2Dshige software (Kwansei- Gakuin University, Japan). The detailed information of 2D-COS calculation is based on the work of Zhou et al12. The synchronous and asynchronous spectra can be interpreted by a set of well-established principles. Autopeaks (denoted as Φ (v1, v1)), which are located on the diagonal of synchronous spectra, represent the susceptibility of intensity changes to the perturbation. Cross-peaks (denoted as Φ (v1, v2)), located off the diagonal, suggest the coordinated changes of spectral intensities observed at two different spectral variables (v1, v2). Cross-peaks with positive signs indicate that the intensity changes at the corresponding spectral coordinates are in the same direction, while negative signs indicate the opposite direction. In asynchronous spectra, cross-peaks (denoted as Ψ (v1, v2)) represent the sequence of the events (or variable changes) caused by given perturbations. In brief, if Φ (v1, v2) and Ψ (v1, v2) are of same sign, changes at peak v1 occur prior to those at peak v2; if they are of opposite signs, changes at v2 occur prior to those at v1; if Φ (v1, v2) or Ψ (v1, v2) is zero, the changes at v1 and v2 occur simultaneously.

**Supplementary Method 5. Mass difference network analysis**

Functional network reconstruction was applied to calculate the possible transformation network from precursors to products. Theoretical masses of all formulas (CHO and CHNO) were taken as reference masses. If the theoretical ion mass (node) difference was equal to the theoretical mass of O (15.994915 amu), -H2 (2.015650 amu), and ClH-1 (33.961028 amu), etc, the edge connection was established.

**Supplementary Method 6. Molecular transformation calculation**

The mass difference between FT-ICR MS peaks in each sample was used to reveal potential biochemical transformations between molecules13, 14. The biochemical transformation between two molecules was identified if the mass difference could be attributed to a specific compound in the transformation database (https://github.com/danczakre/Meta-Metabolome_Ecology). The Gibbs free energy for the half-reaction of carbon oxidation (∆G0) was calculated as follows:

(1)

The value of the energy change (∆G) was defined as follows15: (2)

where ∆G0,before and ∆G0,after represent ∆G0 before and after molecular transformation, respectively. ∆G ≤ 0: thermodynamically favorable processes (TFP); ∆G > 0: thermodynamically limited processes (TLP).

**Supplementary Method 7. Details of characterizing the solid phase with** **X-ray absorption fine structure (XAFS) analyses.**

Cd *K*-edge analysis was performed with Si (111) crystal monochromators at the BL14W1 beamlines at the Shanghai Synchrotron Radiation Facility (SSRF) (Shanghai, China). Before the analysis at the beamline, samples were pressed into thin sheets with 1 cm in diameter and sealed using Kapton tape film. The XAFS spectra were recorded at room temperature using a 4-channel Silicon Drift Detector (SDD) Bruker 5040. Cd *K*-edge extended X-ray absorption fine structure (EXAFS) spectra were recorded in transmission mode. Negligible changes in the line-shape and peak position of Cd *K*-edge XANES spectra were observed between two scans taken for a specific sample. The XAFS spectra of these standard samples were recorded in transmission mode. The spectra were processed and analyzed by the software codes Athena and Artemis.

**Supplementary Method 8. Details of MD simulations**

All molecular dynamic simulations were carried out by using LAMMPS 16. The SPCE model 17 was used to describe water molecules. The parameters of Cd2+ and Cl- were taken from previous studies of Li et al 18, 19. The parameters of GA and Trp molecules were obtained from the GAFF 20 force field. The geometry optimization was performed at the B3LYP/6-311G** level with the IEFPCM solvation model using the Gaussian 16W program. The RESP charge 21 were calculated using Multiwfn 22, 23. The energy minimization was performed and the conjugate gradient algorithm was used. In order to obtain a more reasonable model, short-range Coulomb interaction was first used to run 2 ns NPT, and then switch to long-range Coulomb interaction and continue to run 2 ns NPT for equilibrium. The electrostatic interaction was calculated using particle-particle particle-mesh (PPPM) solver 24. The non-bonded cutoff distance was set to 10 Å. After that, an NVT ensemble was performed for 10 ns. The temperature of 298 K and pressure of 1 atm were maintained by using Nosé-Hoover thermostat and barostat 25, 26. The timestep was set as 1 fs, and water molecules were constrained with SHAKE algorithm. The number of hydrogen bonds was analyzed using VMD program 27 and was calculated using geometric criteria: the donor–acceptor distance was less than 3.5 Å, and the angle was less than 30°.


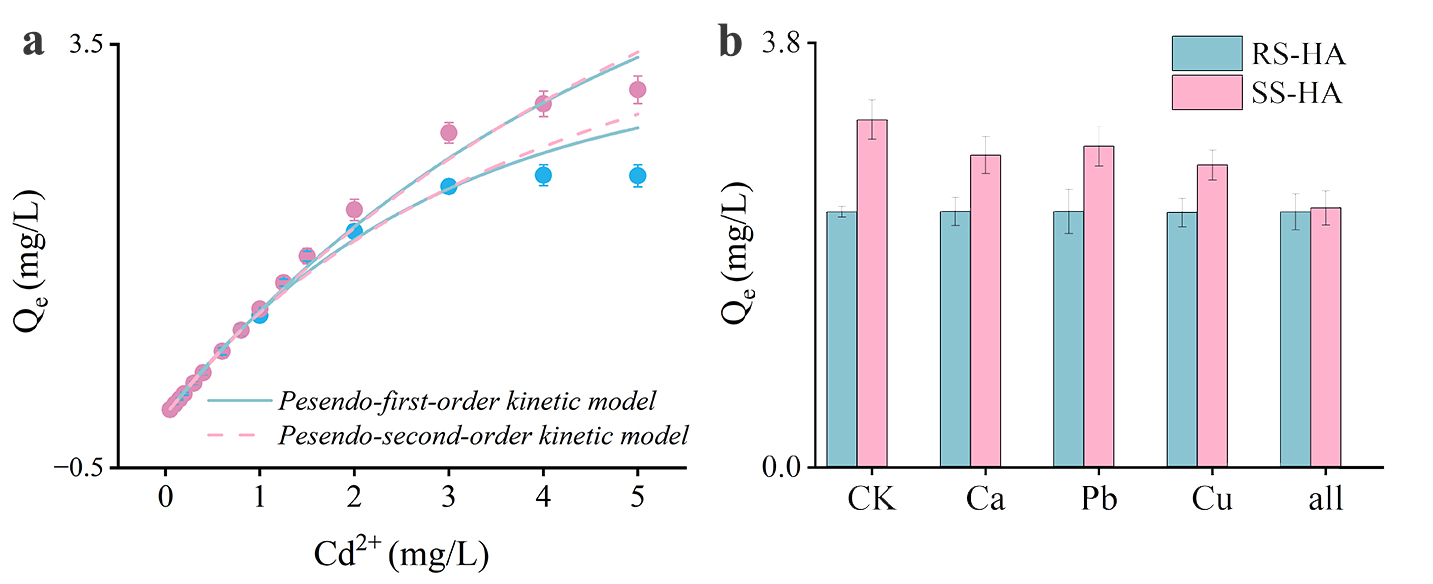


**Supplementary Fig. 1 | (a, b) Adsorption kinetics and competitive cation adsorption experiments of RS-HA and SS-HA.**


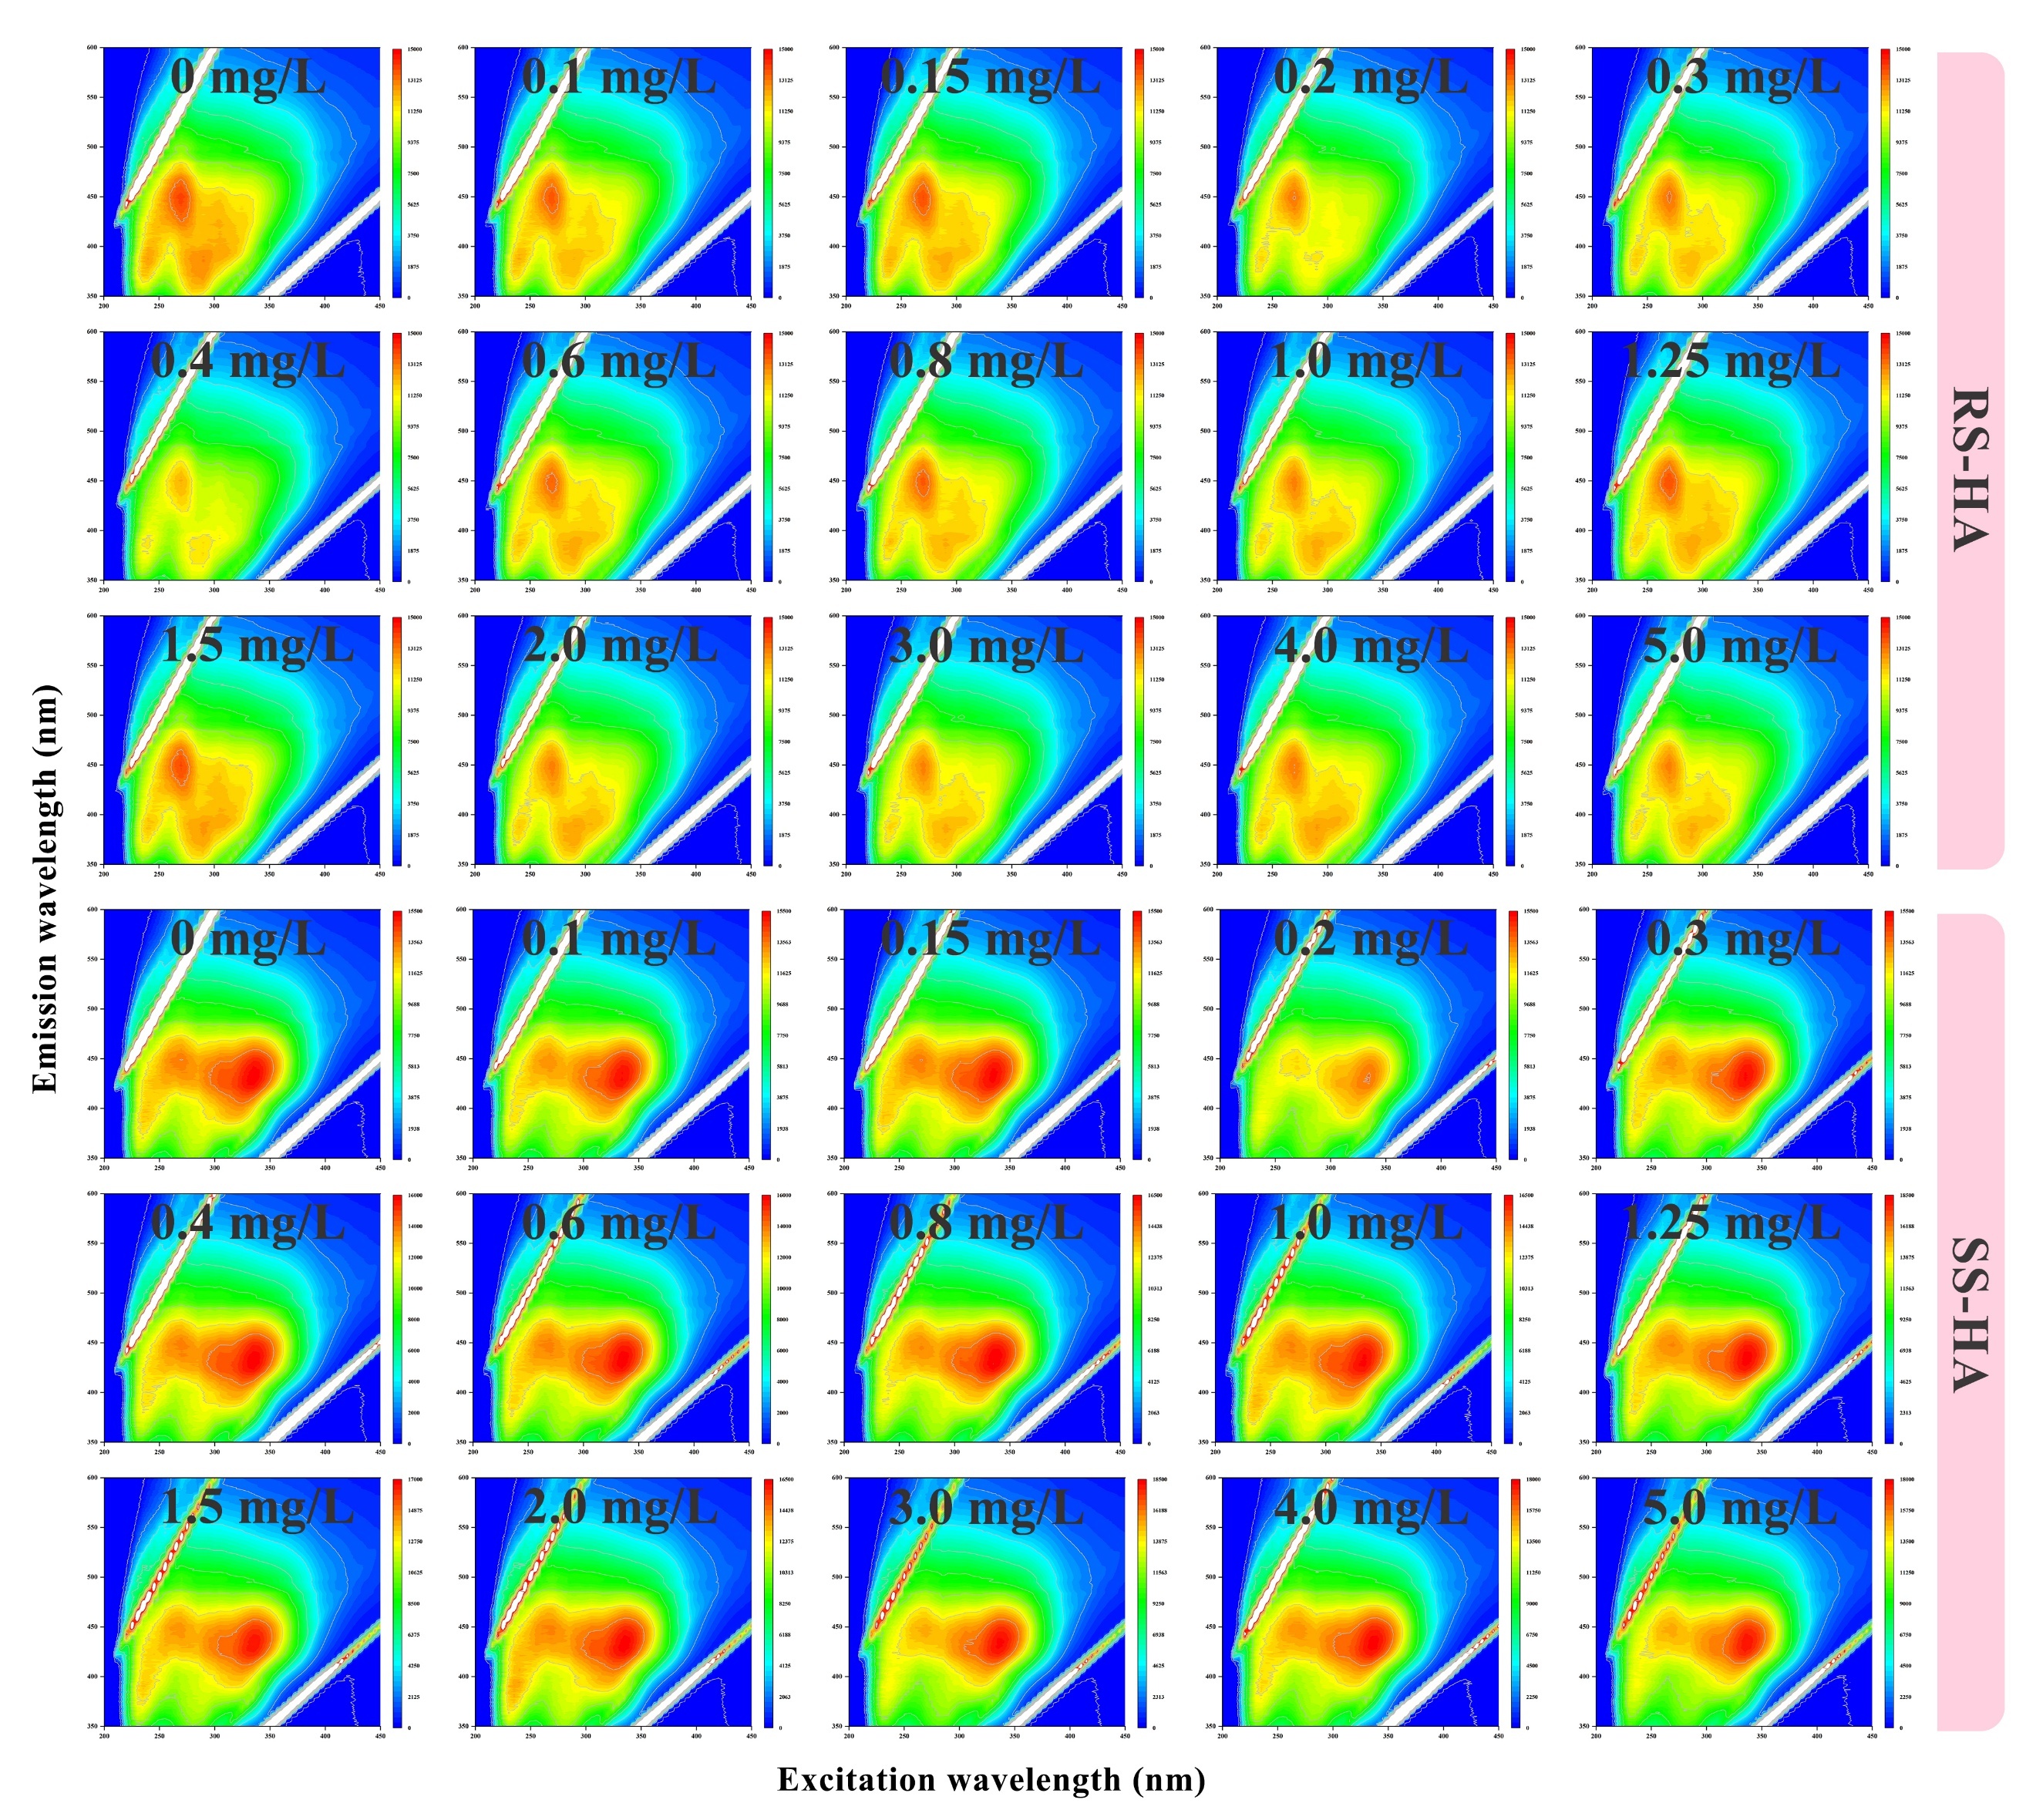


**Supplementary Fig. 2 | Changes in EEM contour maps of A-HA-Cd samples at varying concentrations.**


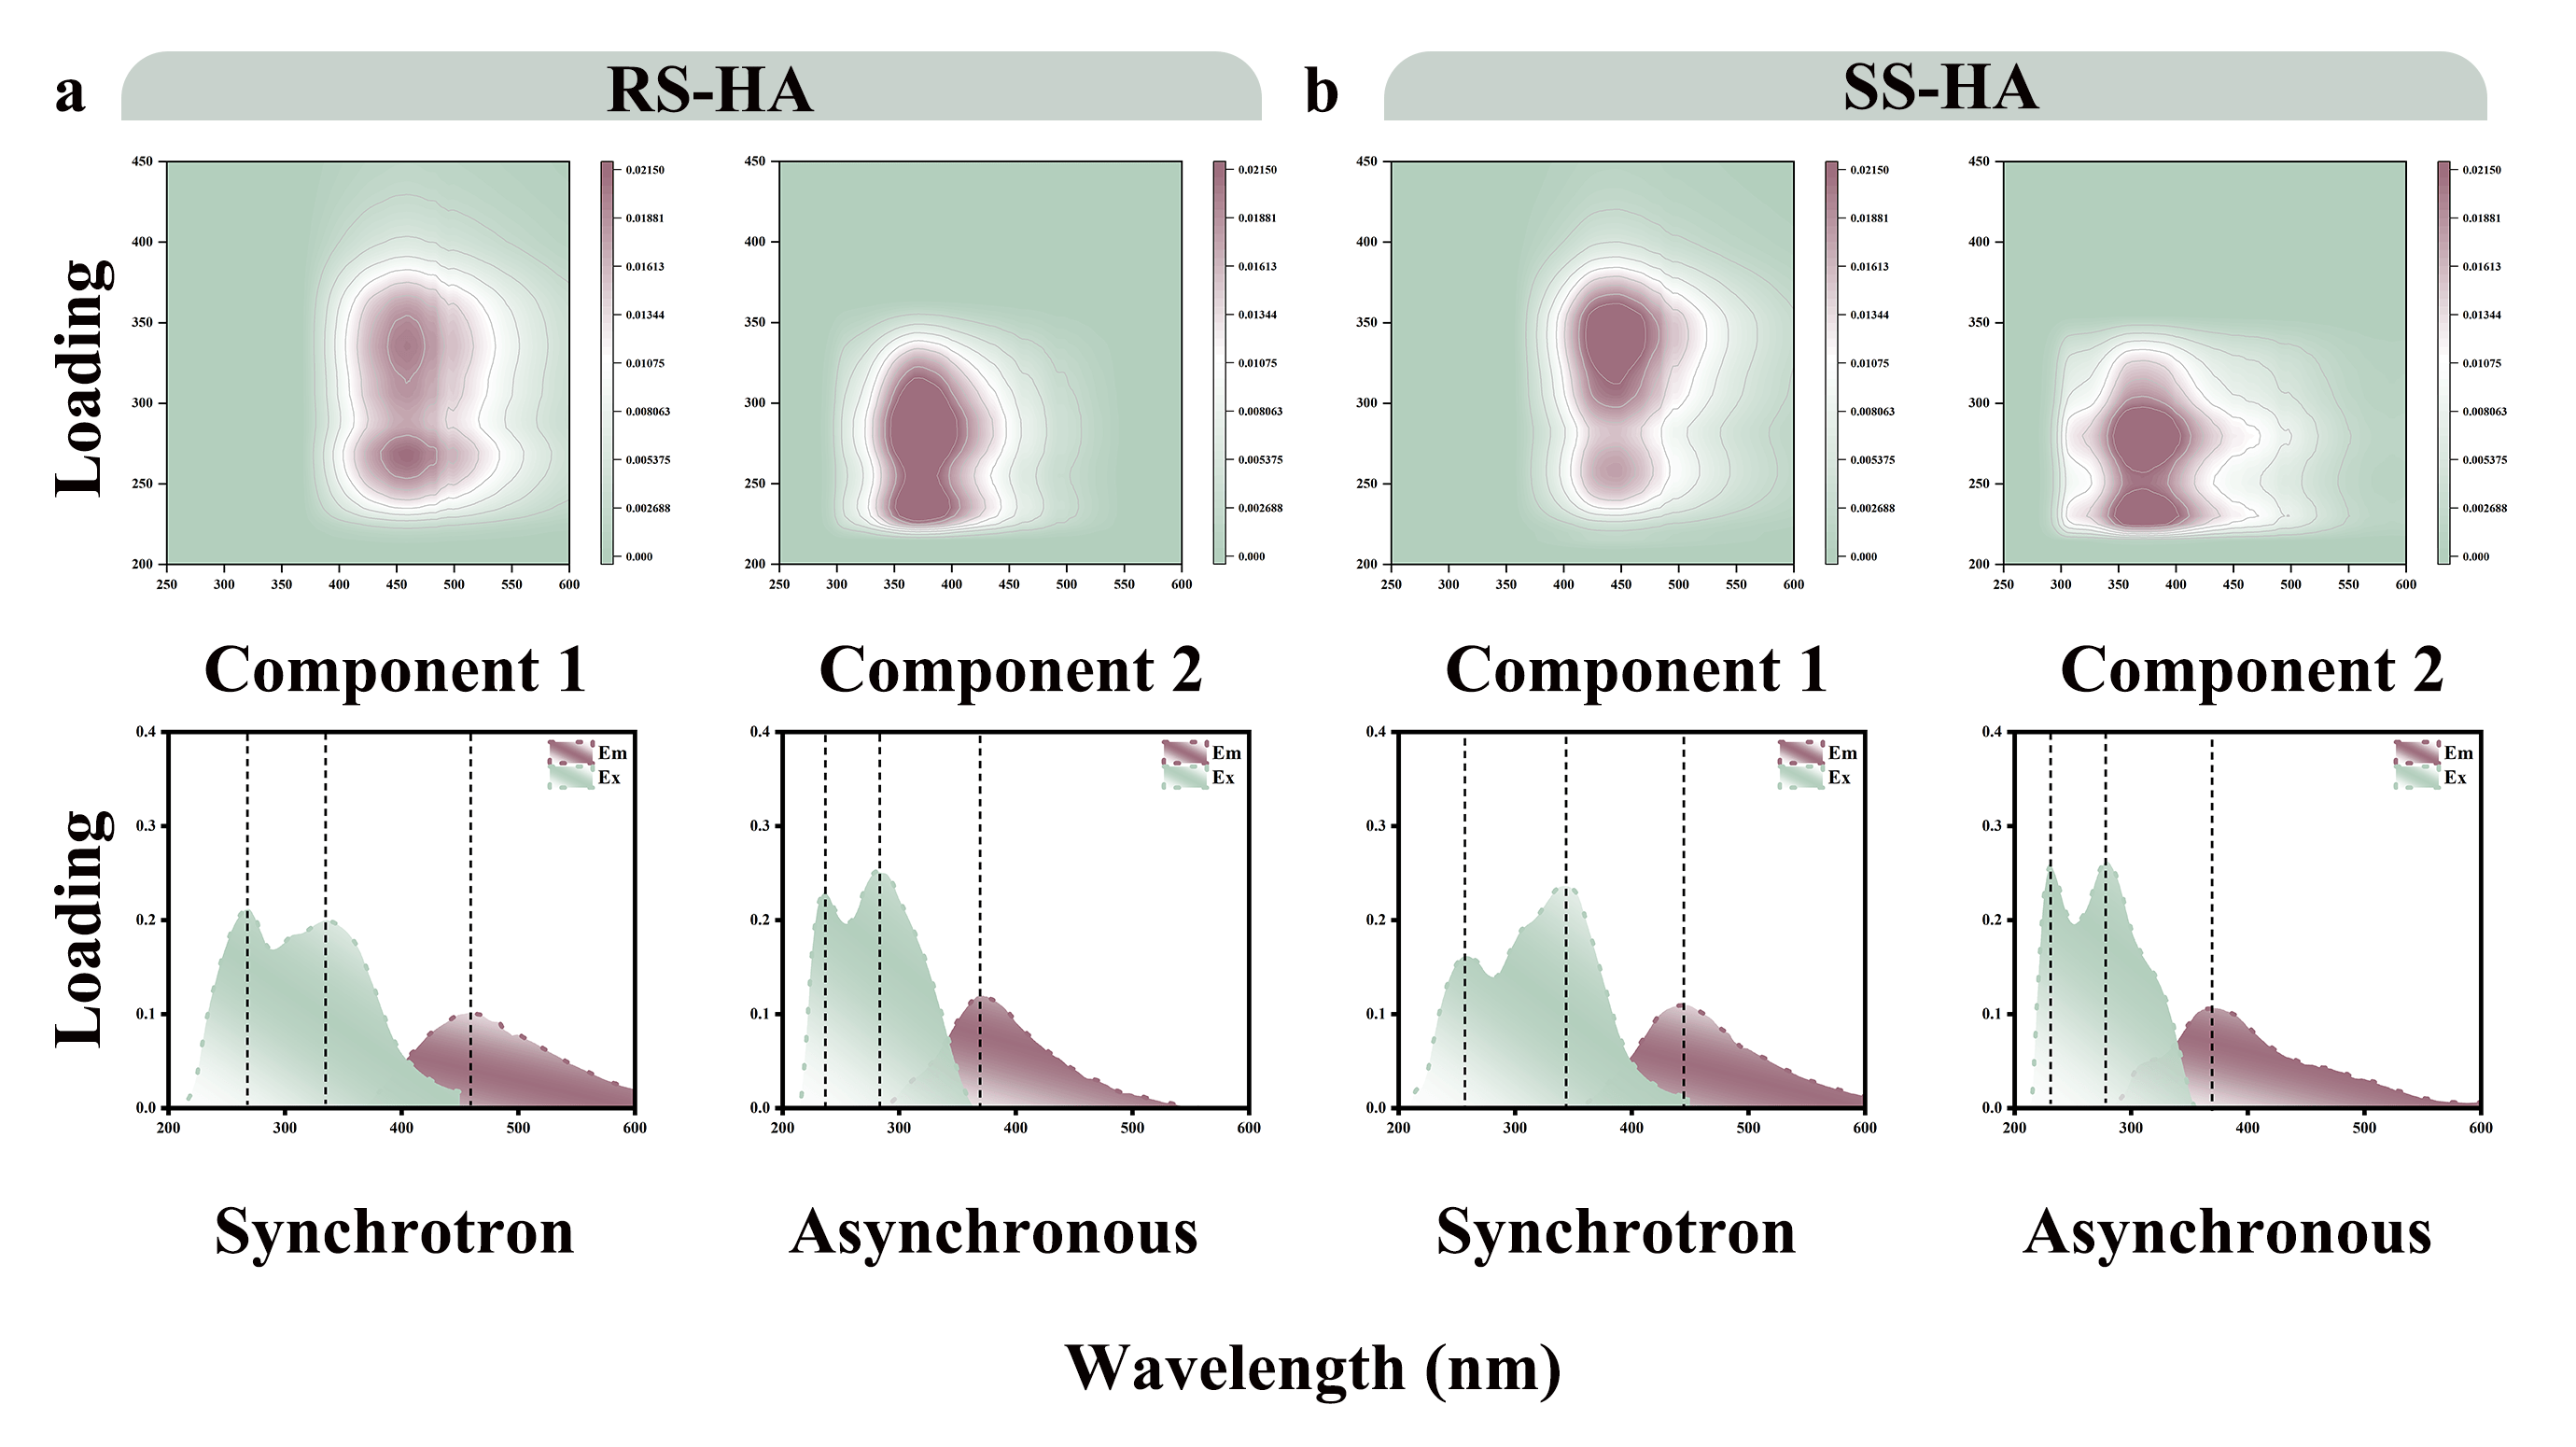


**Supplementary Fig. 3 |** Fluorescent components and fluorescence spectra in different treatment groups.


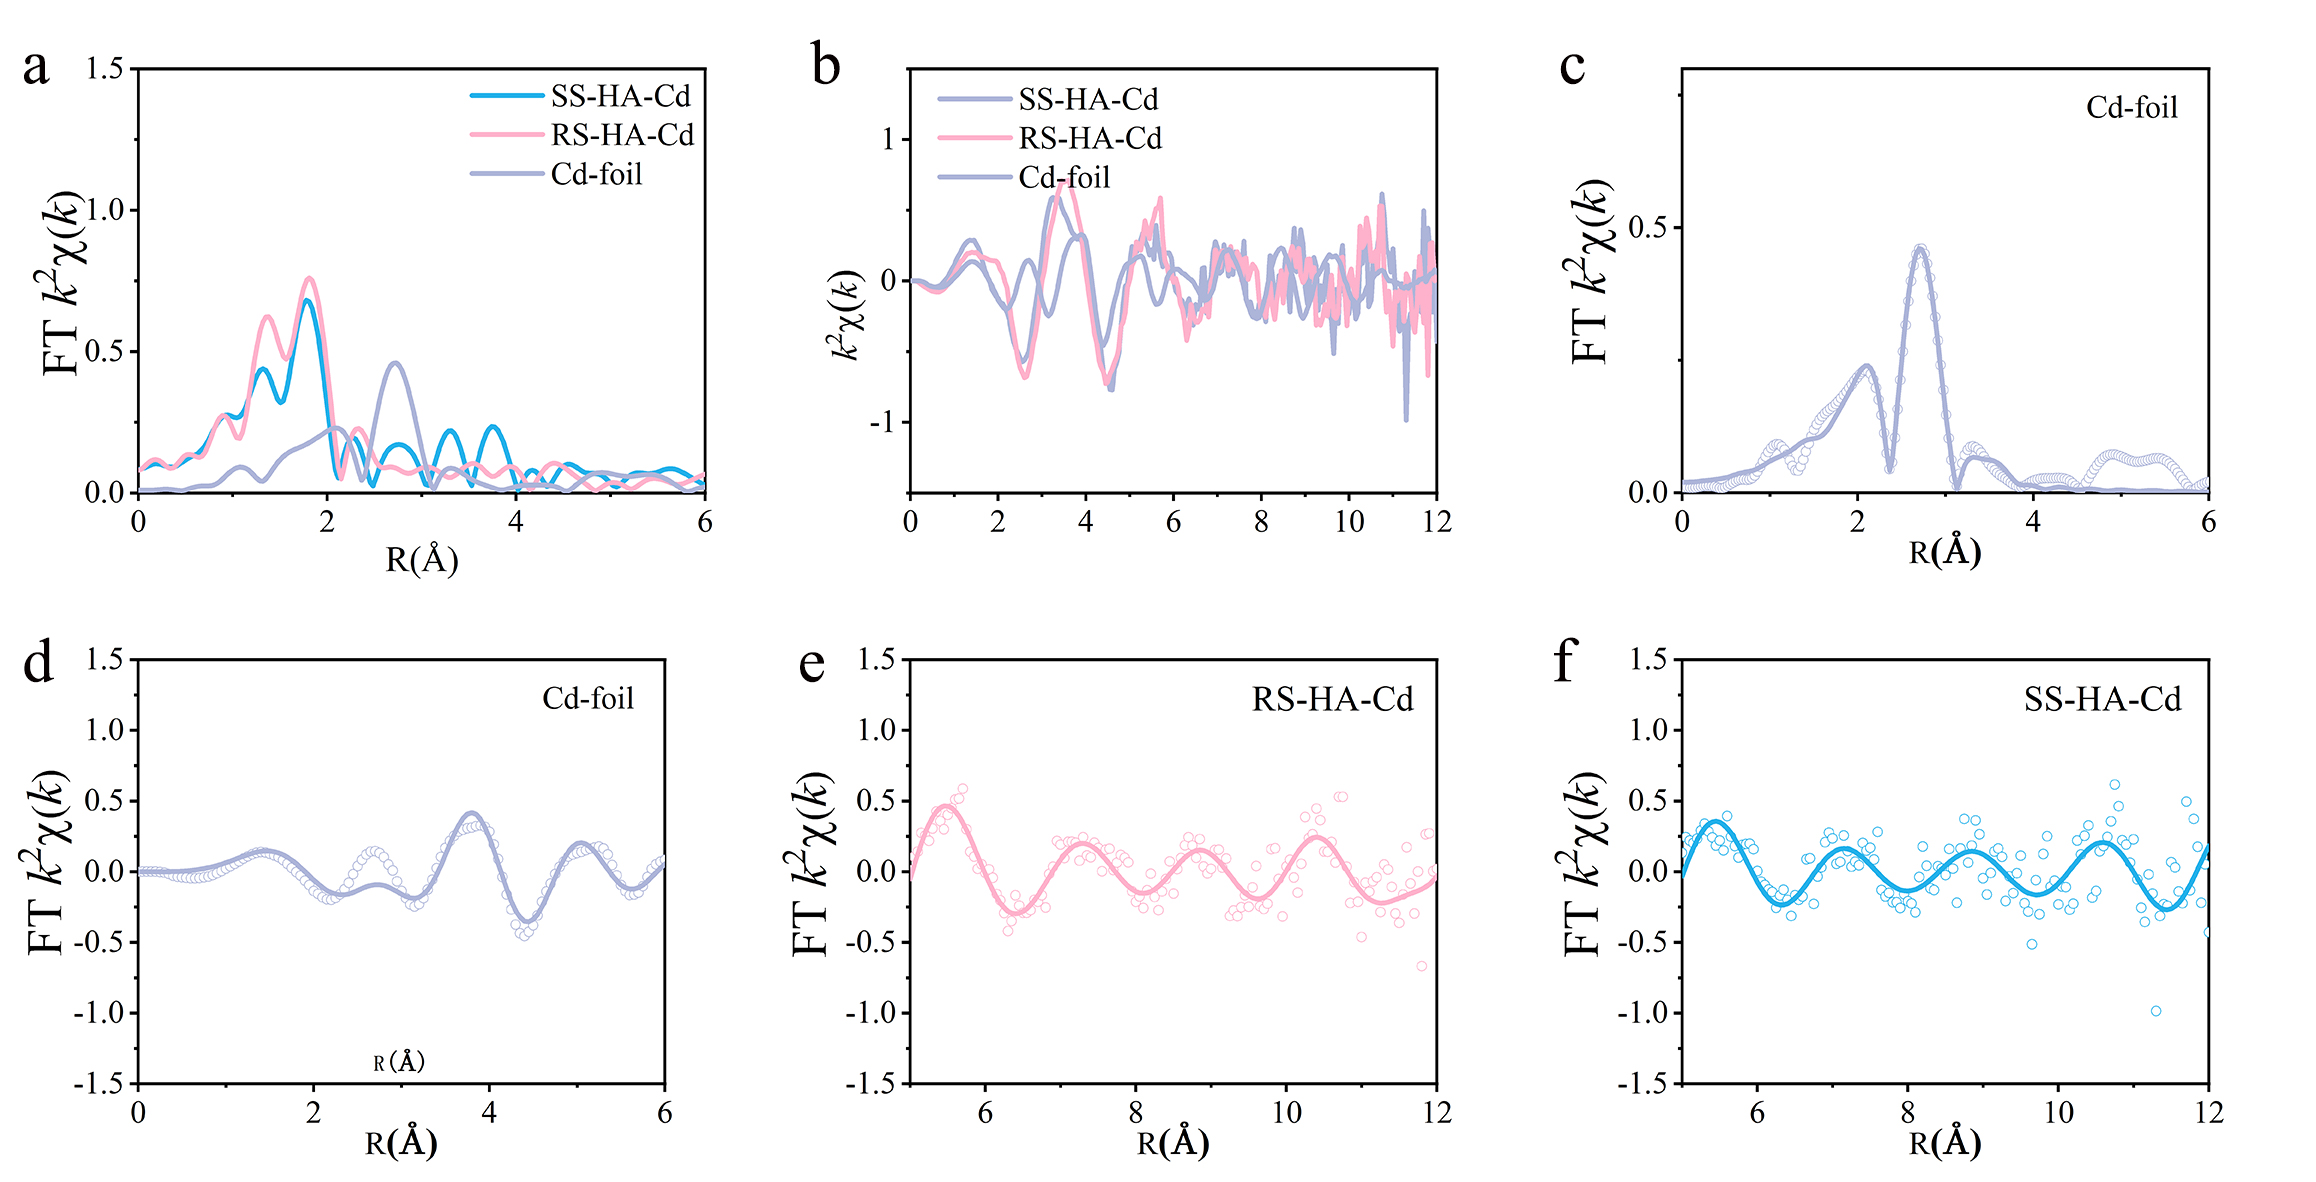


**Supplementary Fig. 4 | K2-weighted K-edge EXAFS spectra and FT-EXAFS fitting curves for Cd-K.** The XANES spectra were fitted using linear combination fitting with the Atoms and FEFF6 programs in Artemis software to obtain the specific coordination numbers and bond lengths of the samples, with the relevant parameters listed in **Supplementary Table 4**.


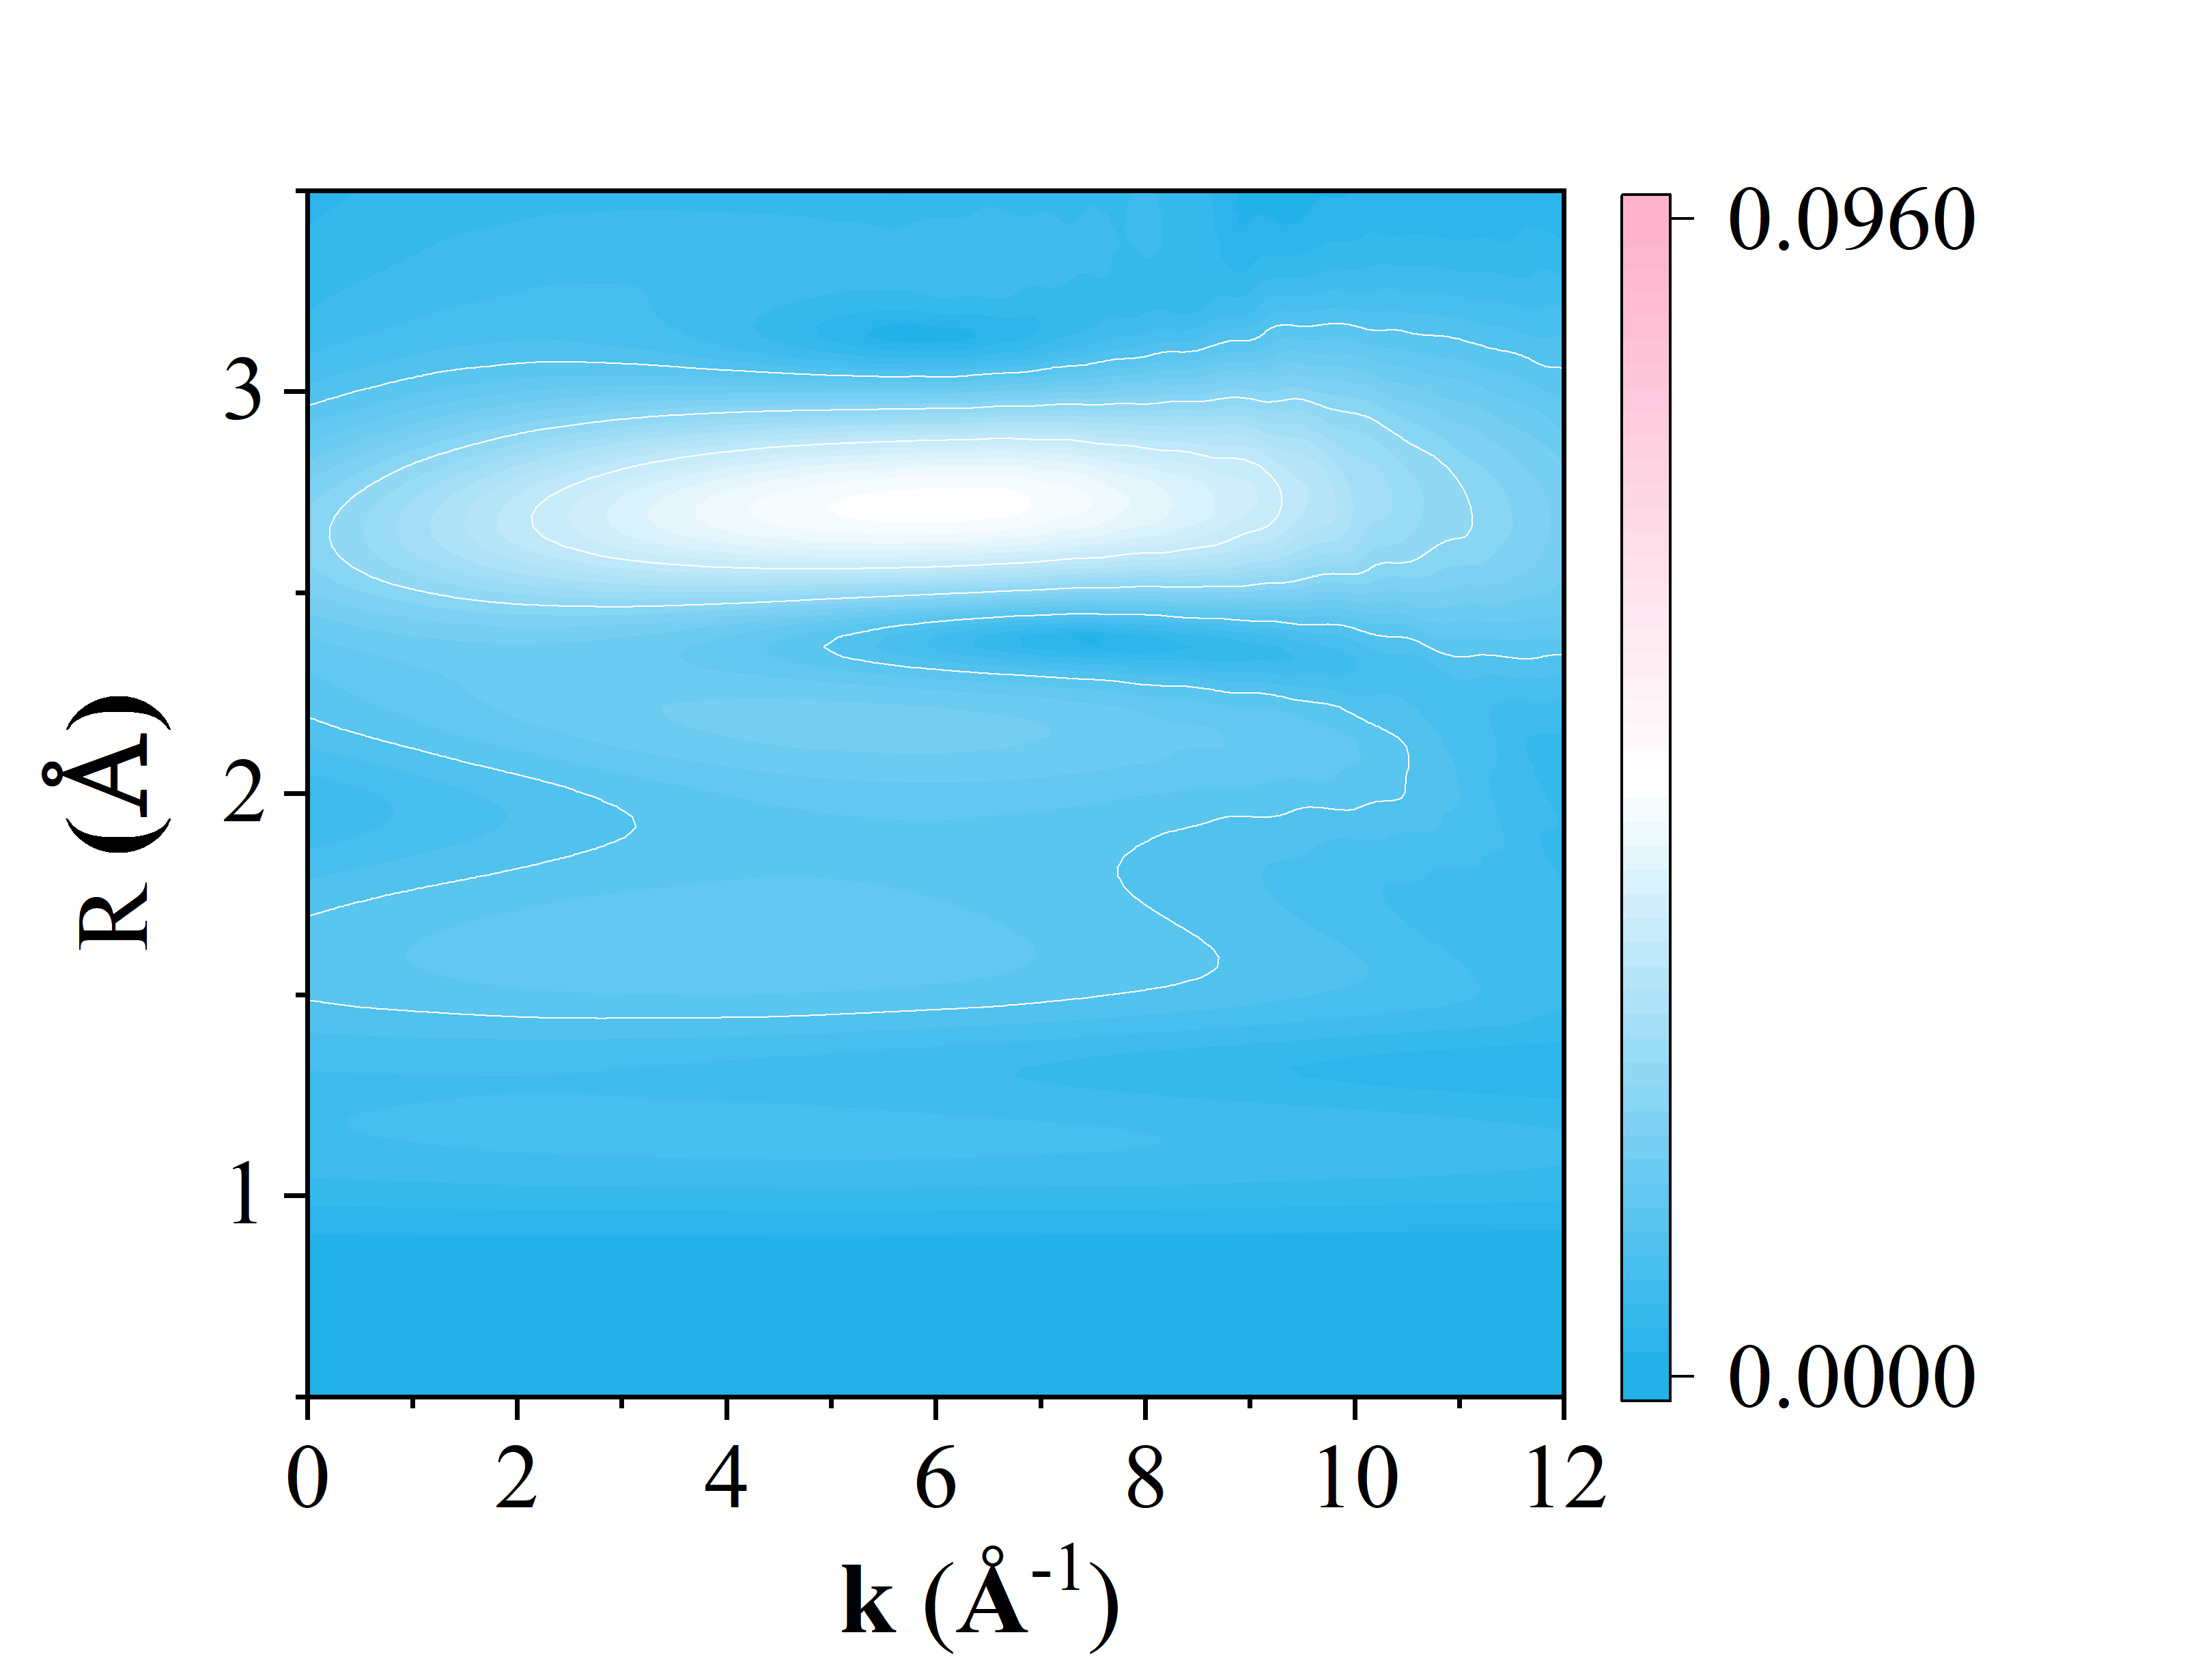


**Supplementary Fig. 5 | Wavelet transform of the Cd K-edge.**

**
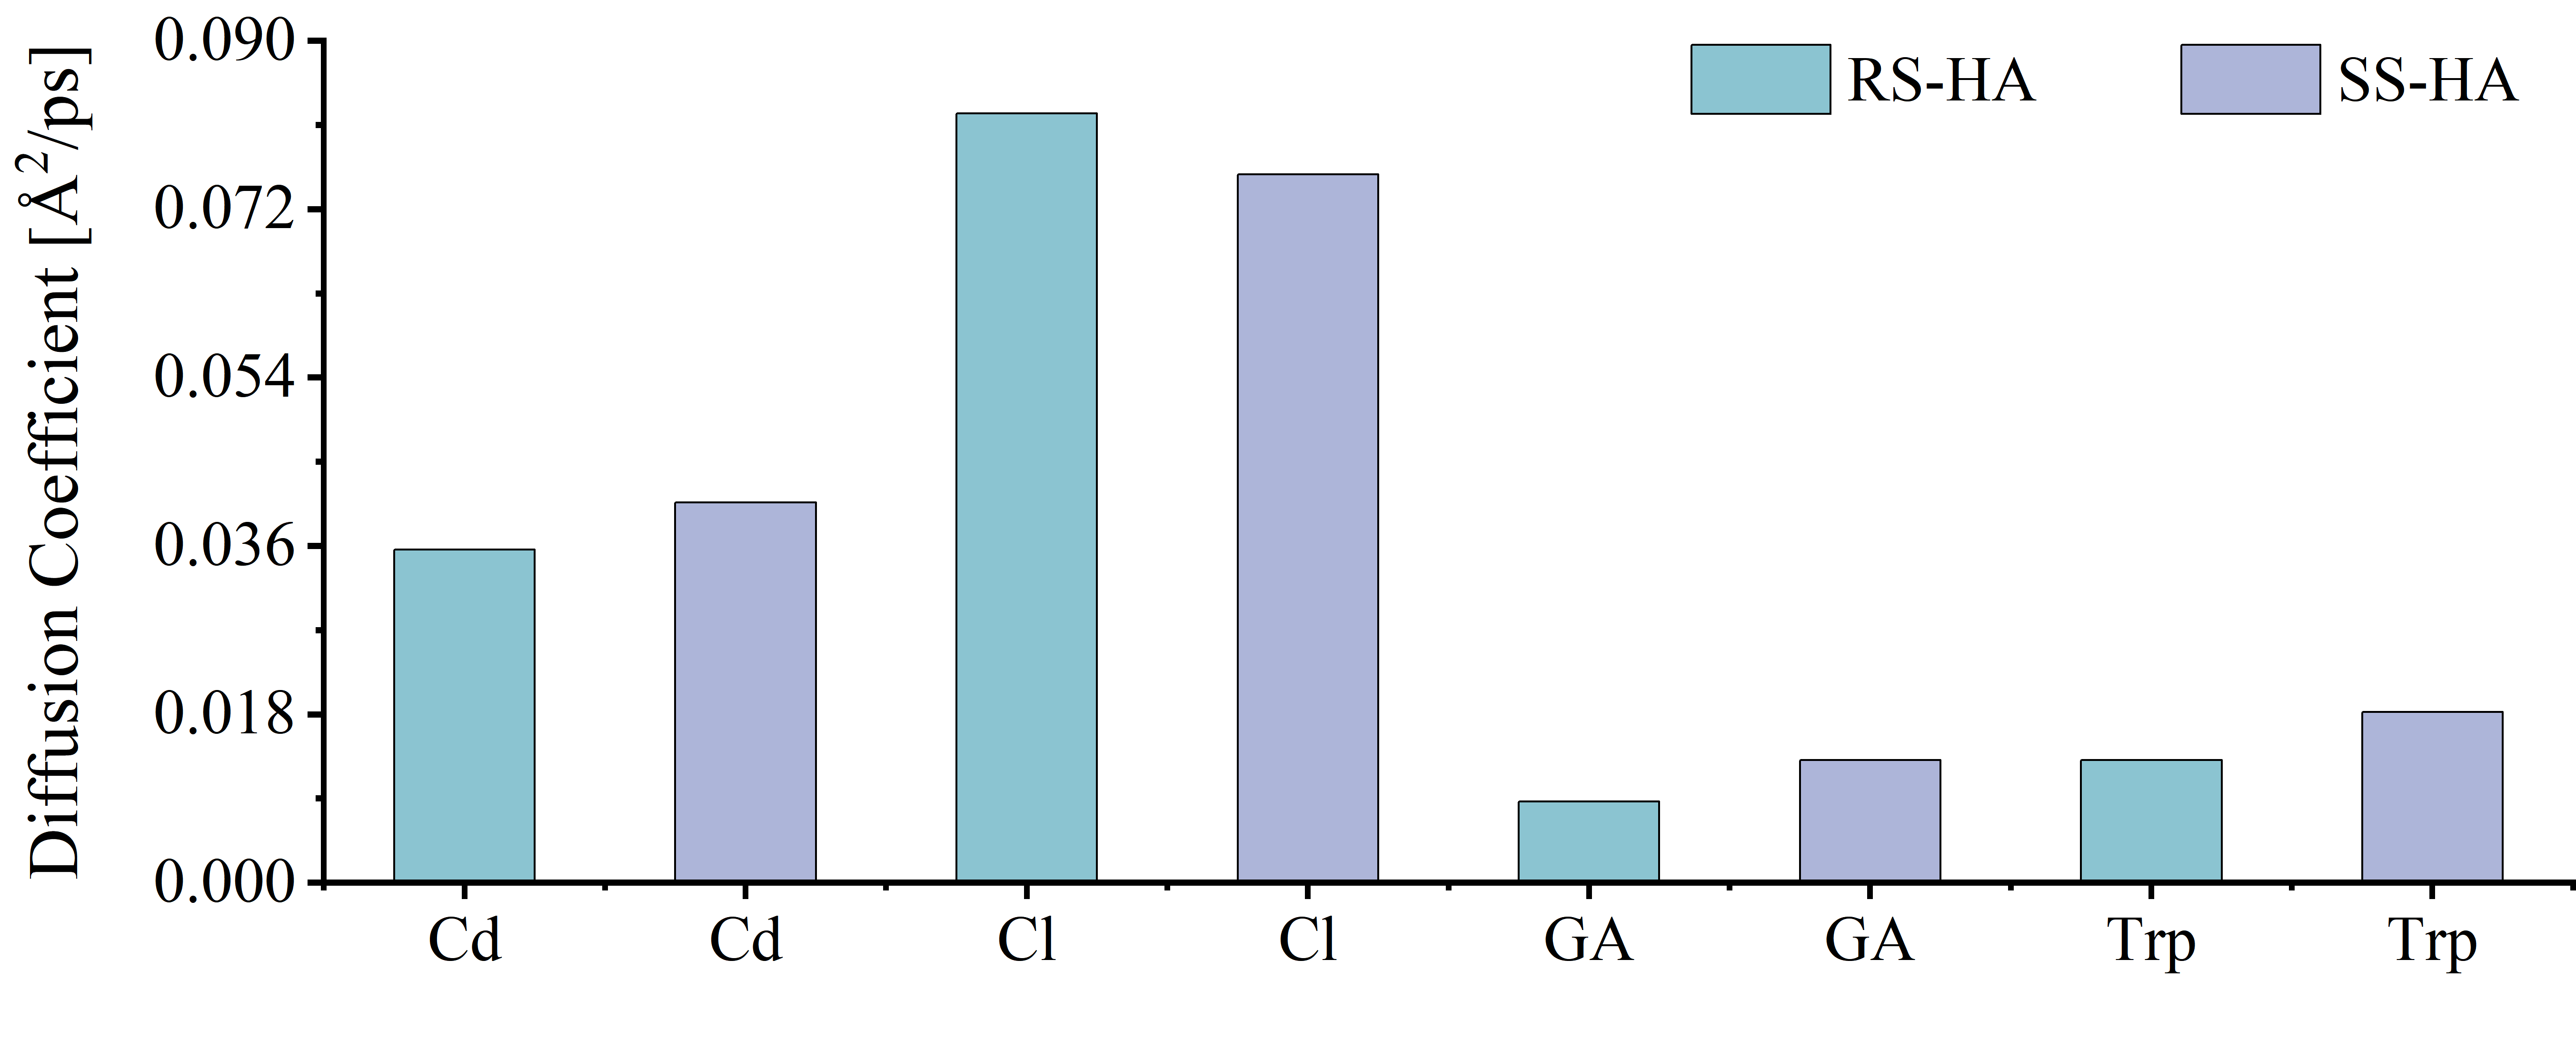
**

**Supplementary Fig. 6 | The *D.* of ions and organic molecules in the RS-HA system and the SS-HA system.**


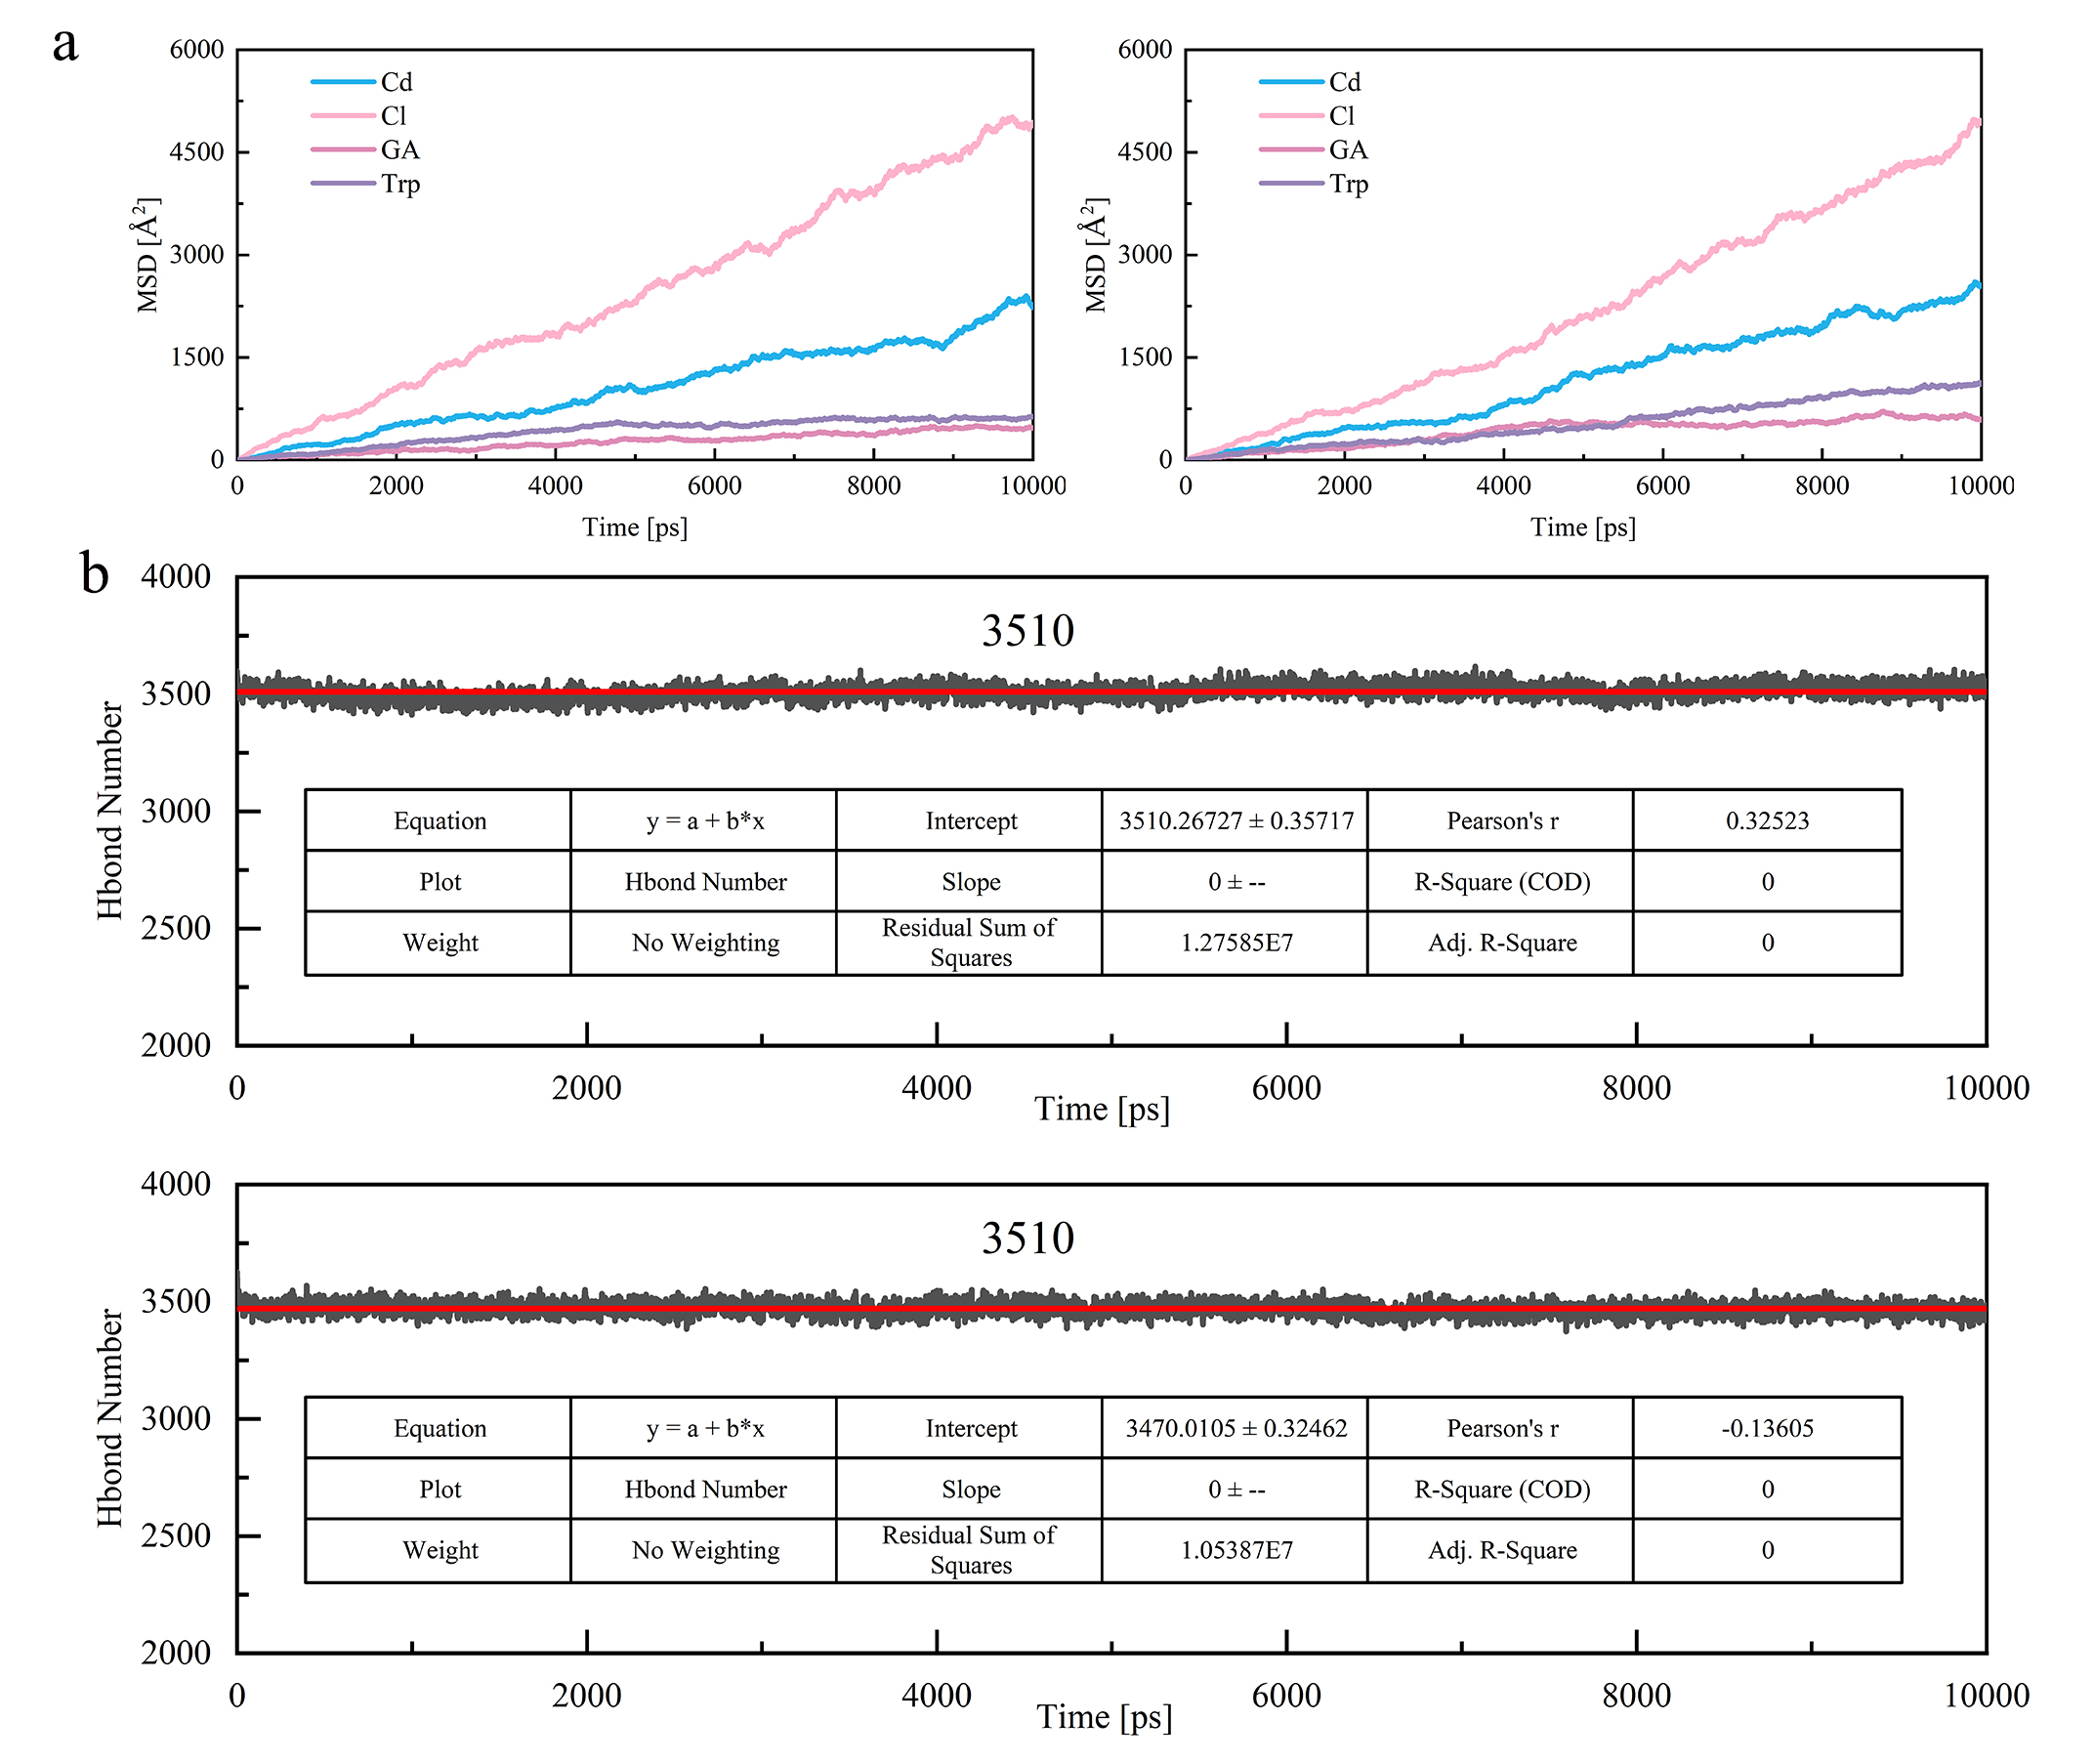


**Supplementary Fig. 7 | The MSD (a) of ions and organic molecules in RS-HA and SS-HA systems. (b) Number of hydrogen bonds between reactive functional groups of different systems.**


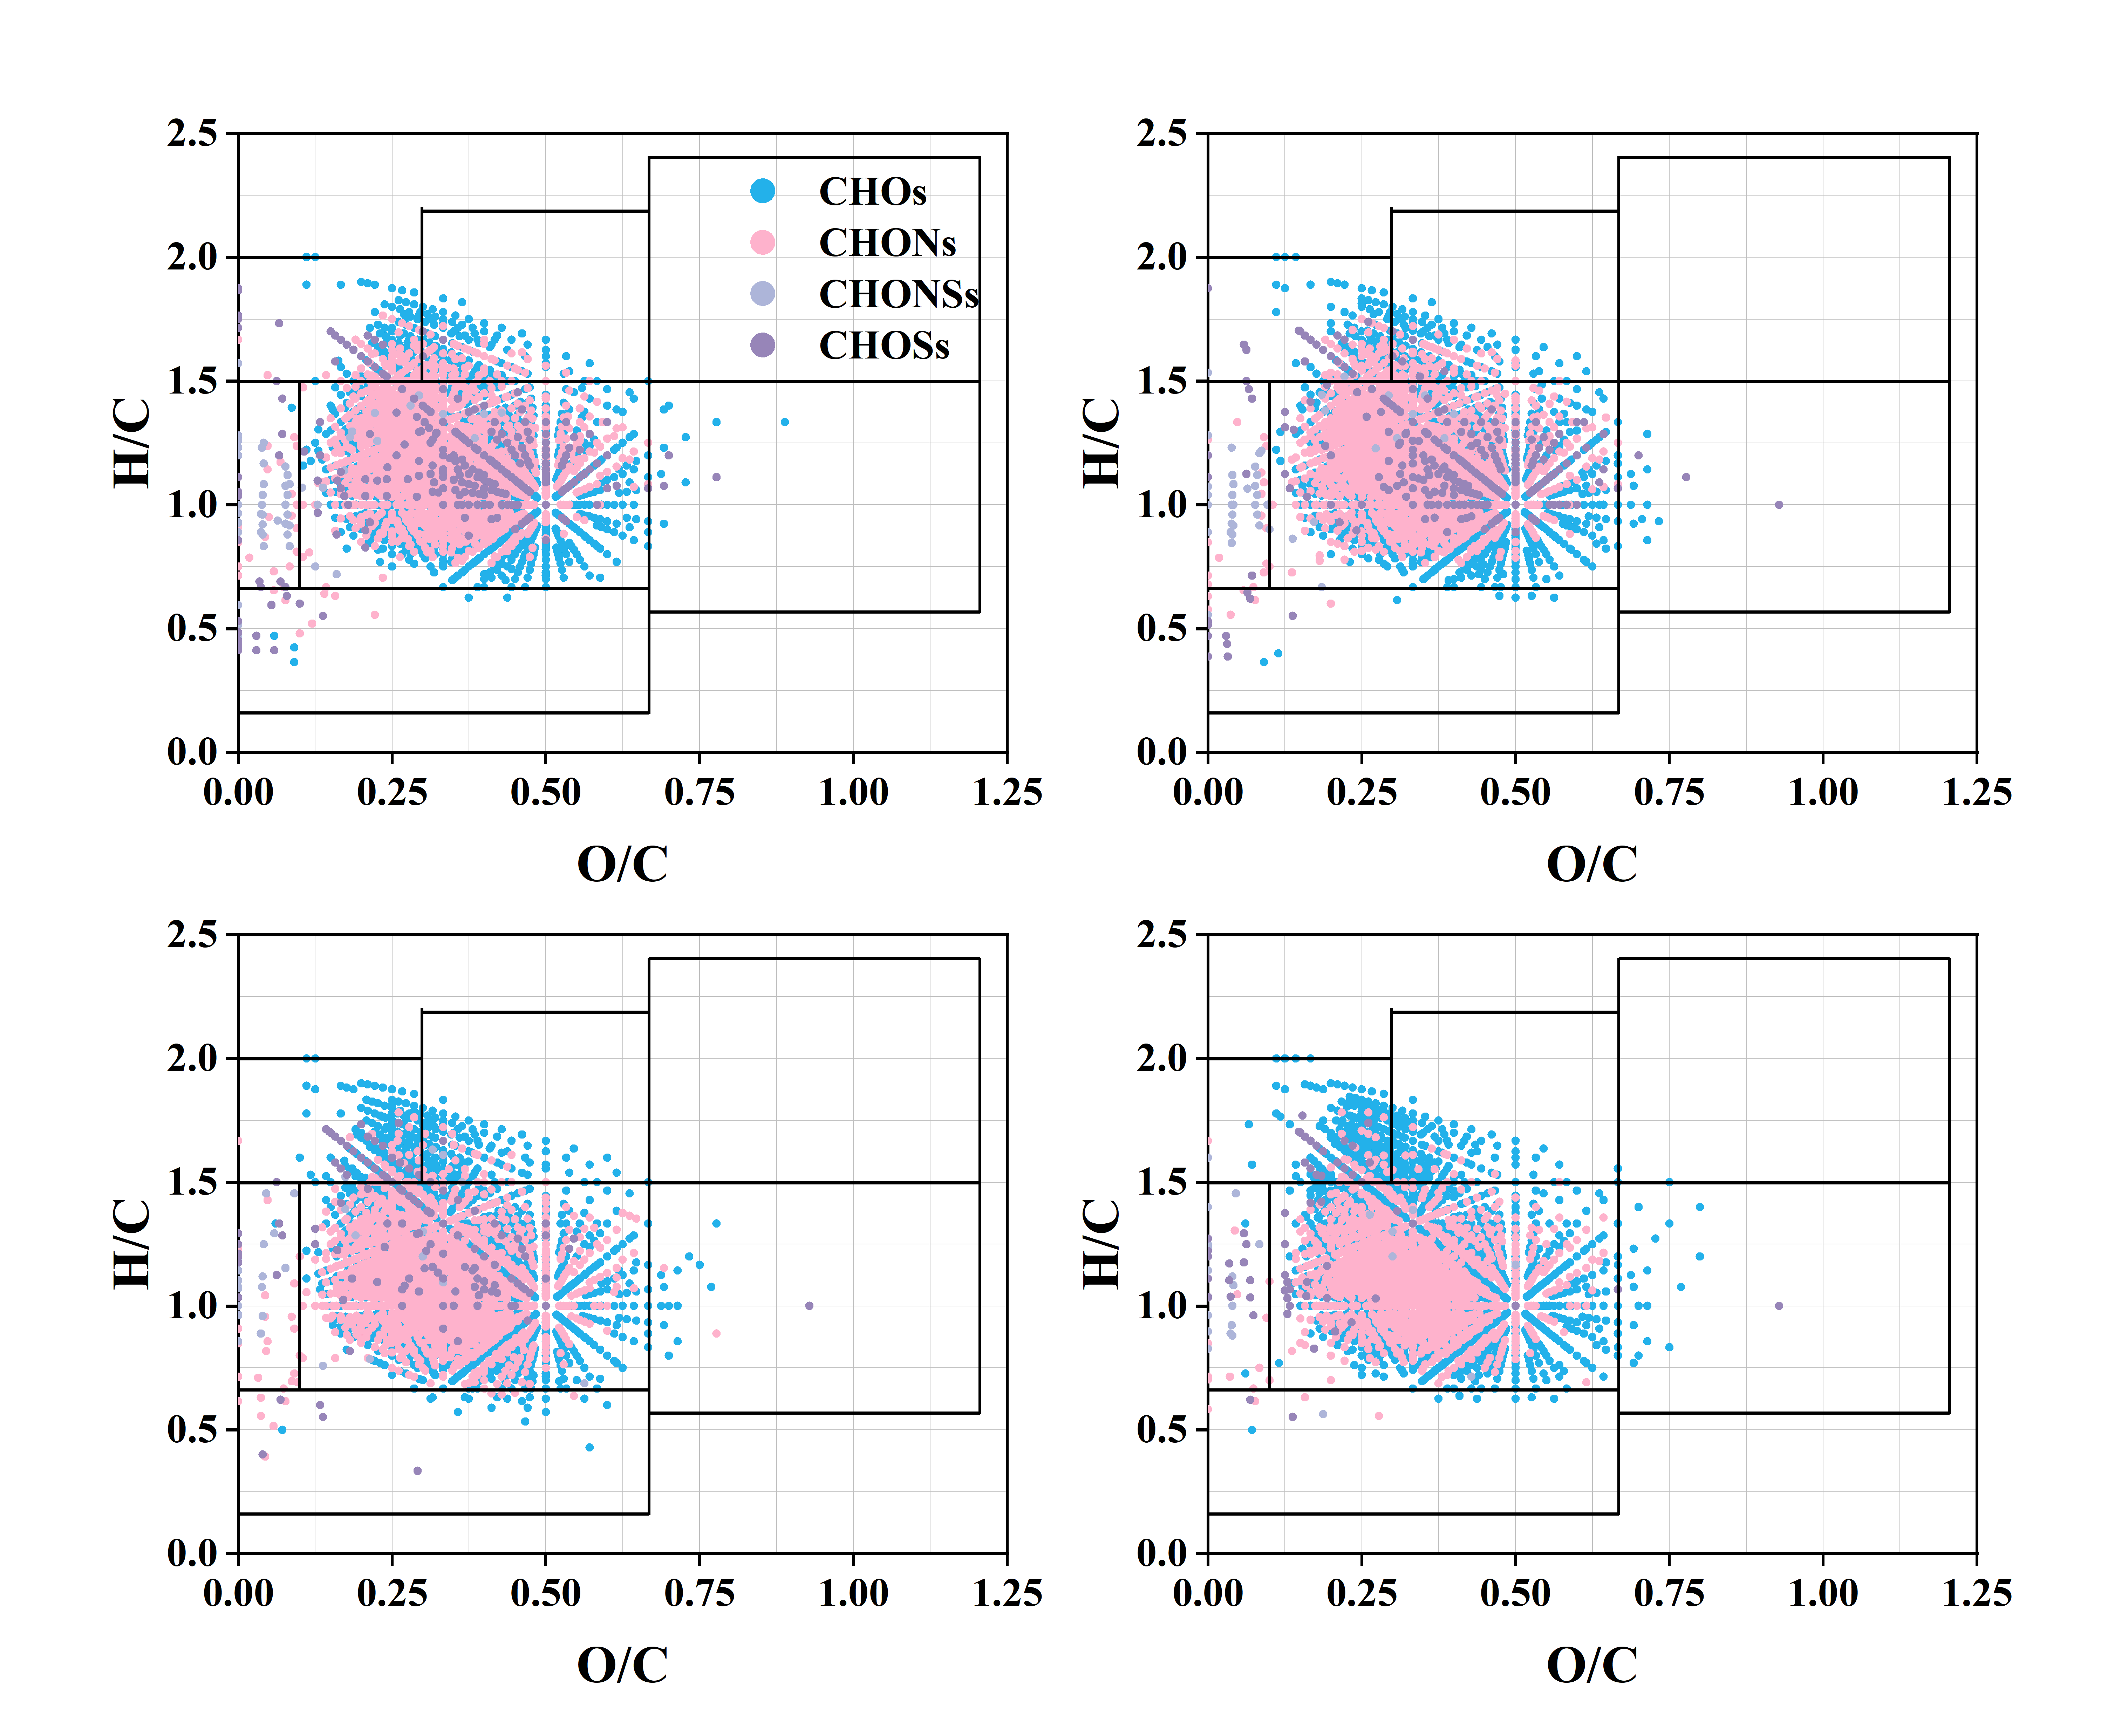


**Supplementary Fig. 8 | The van Krevelen plots for the distribution of A-HA and A-HA-Cd molecular communities classified by elemental compounds.** Based on the stoichiometric ranges defined by Van Krevelen diagram classification (**Supplementary Table 11**), the molecular composition of all three sample groups was predominantly composed of lignin-like substances primarily consisting of CHO and CHON-type compounds.


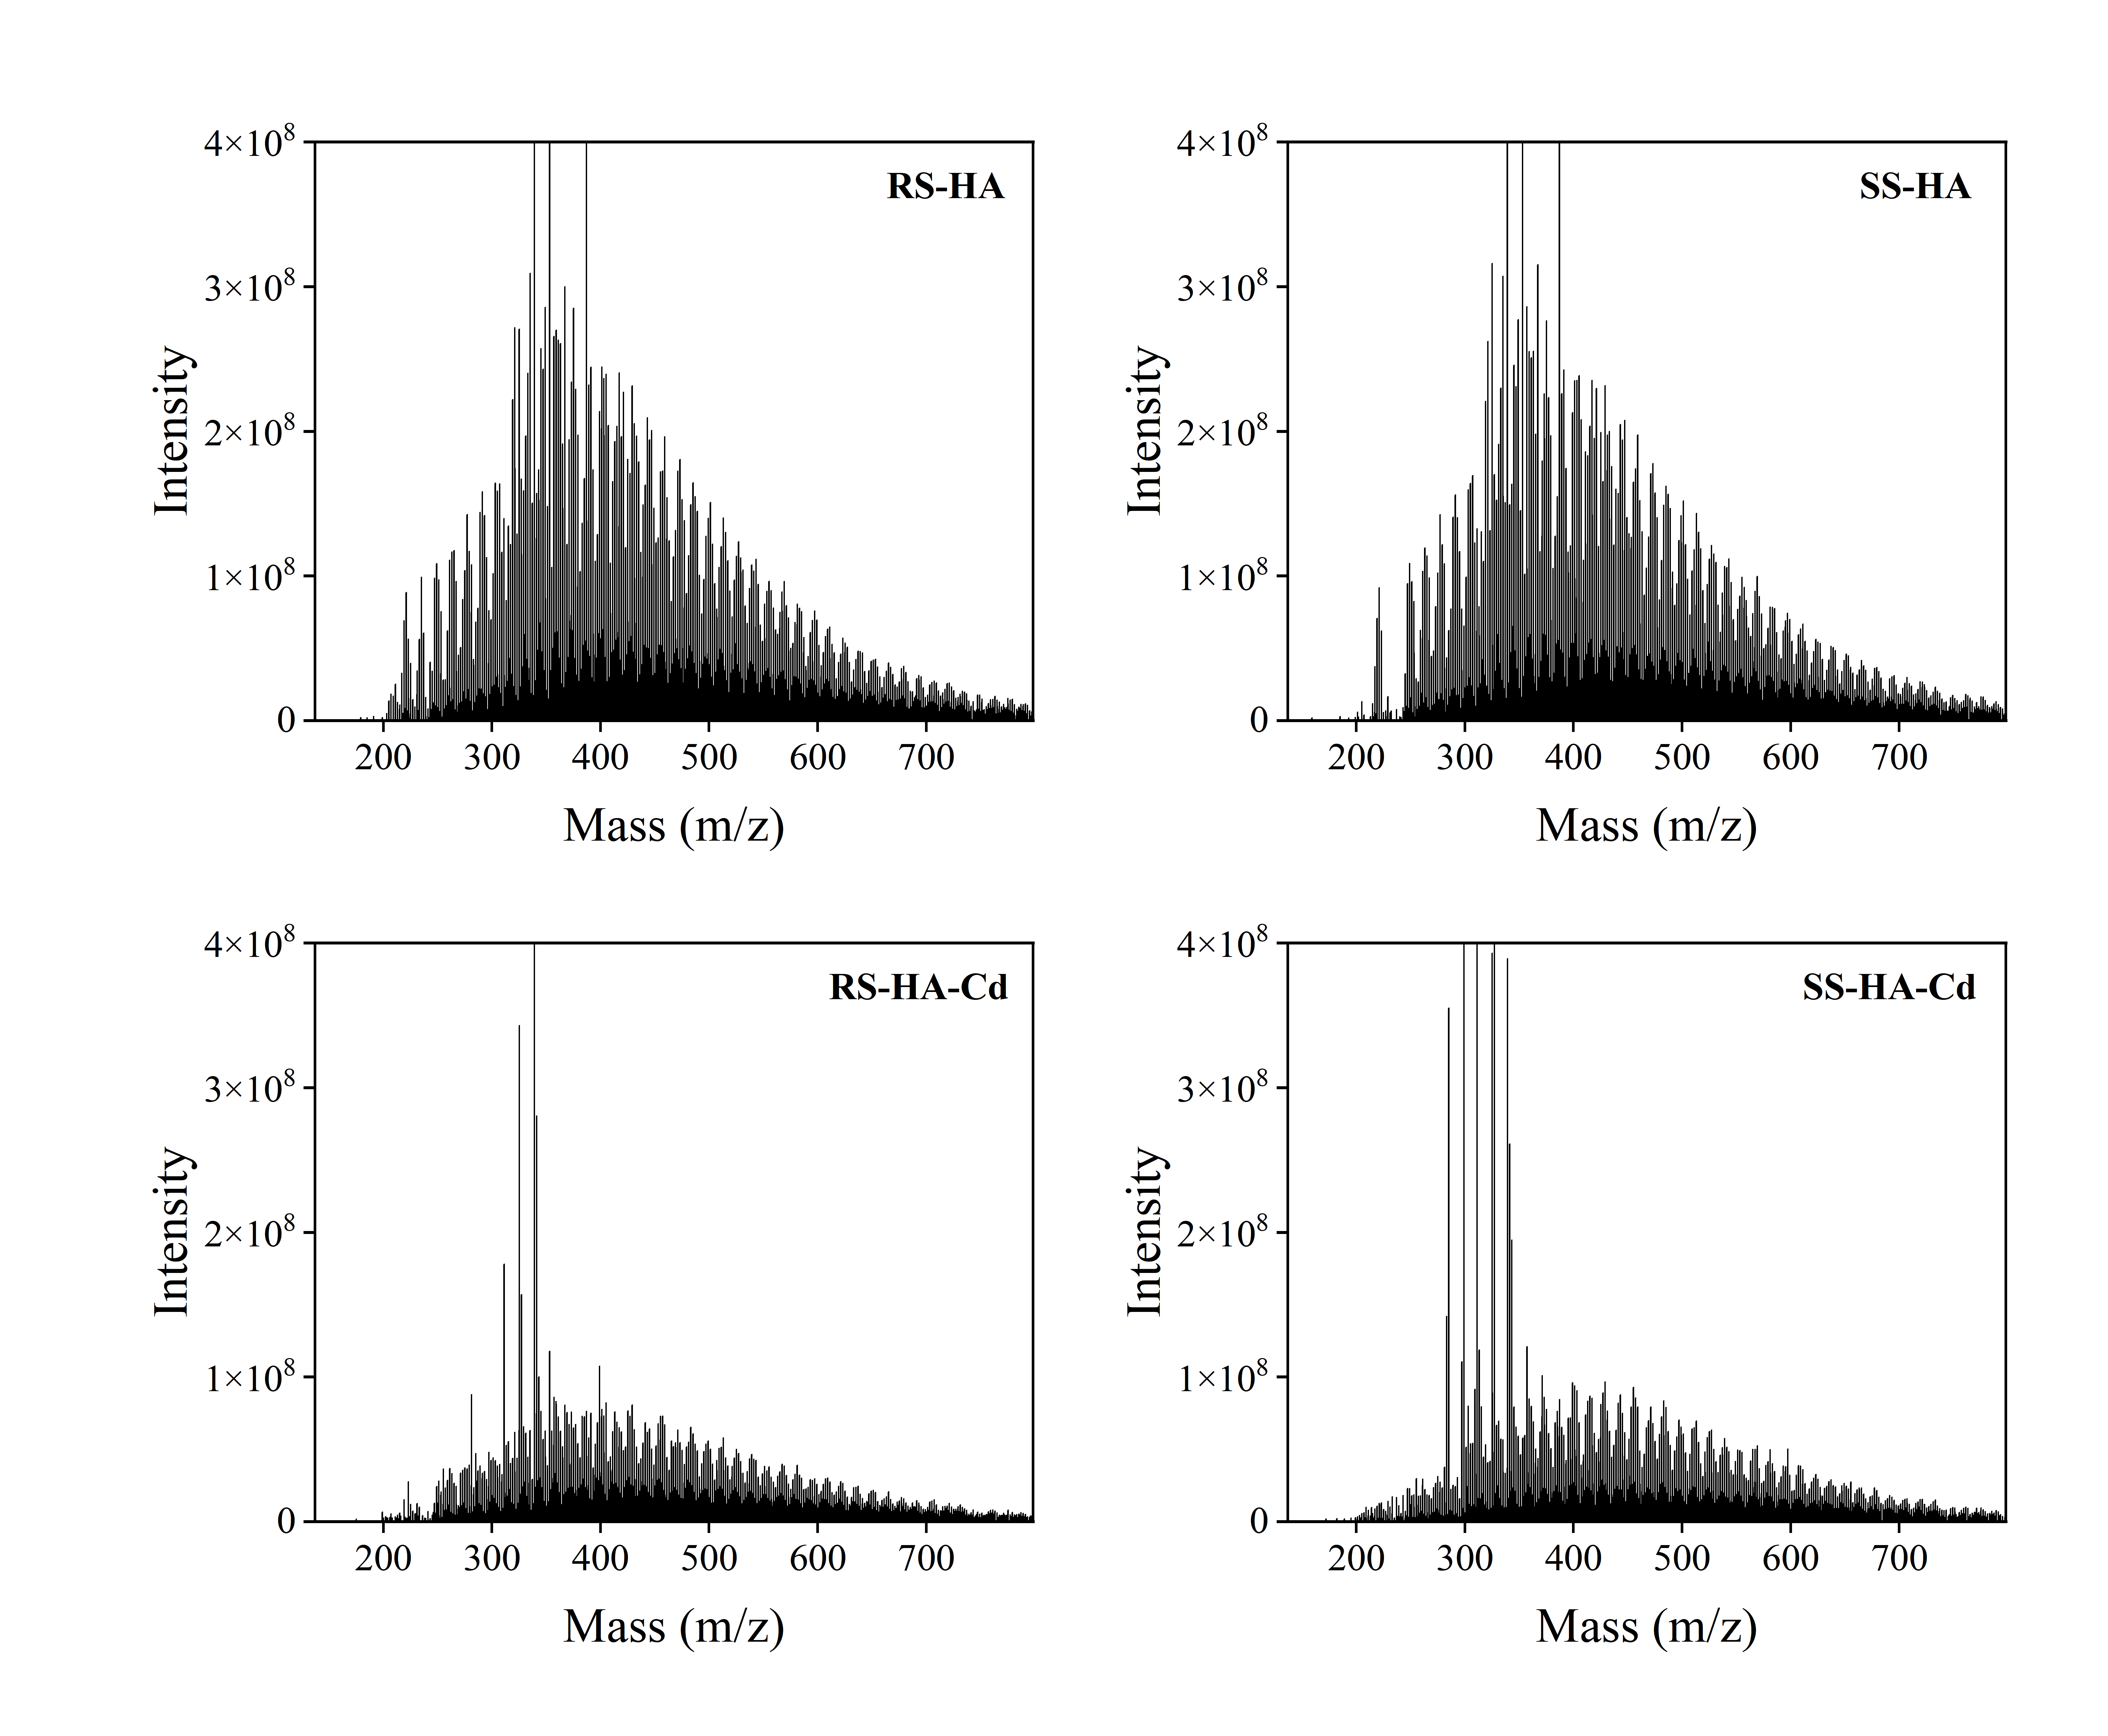


**Supplementary Fig. 9 | ESI negative FT-ICR mass spectra of A-HA and A-HA-Cd.**


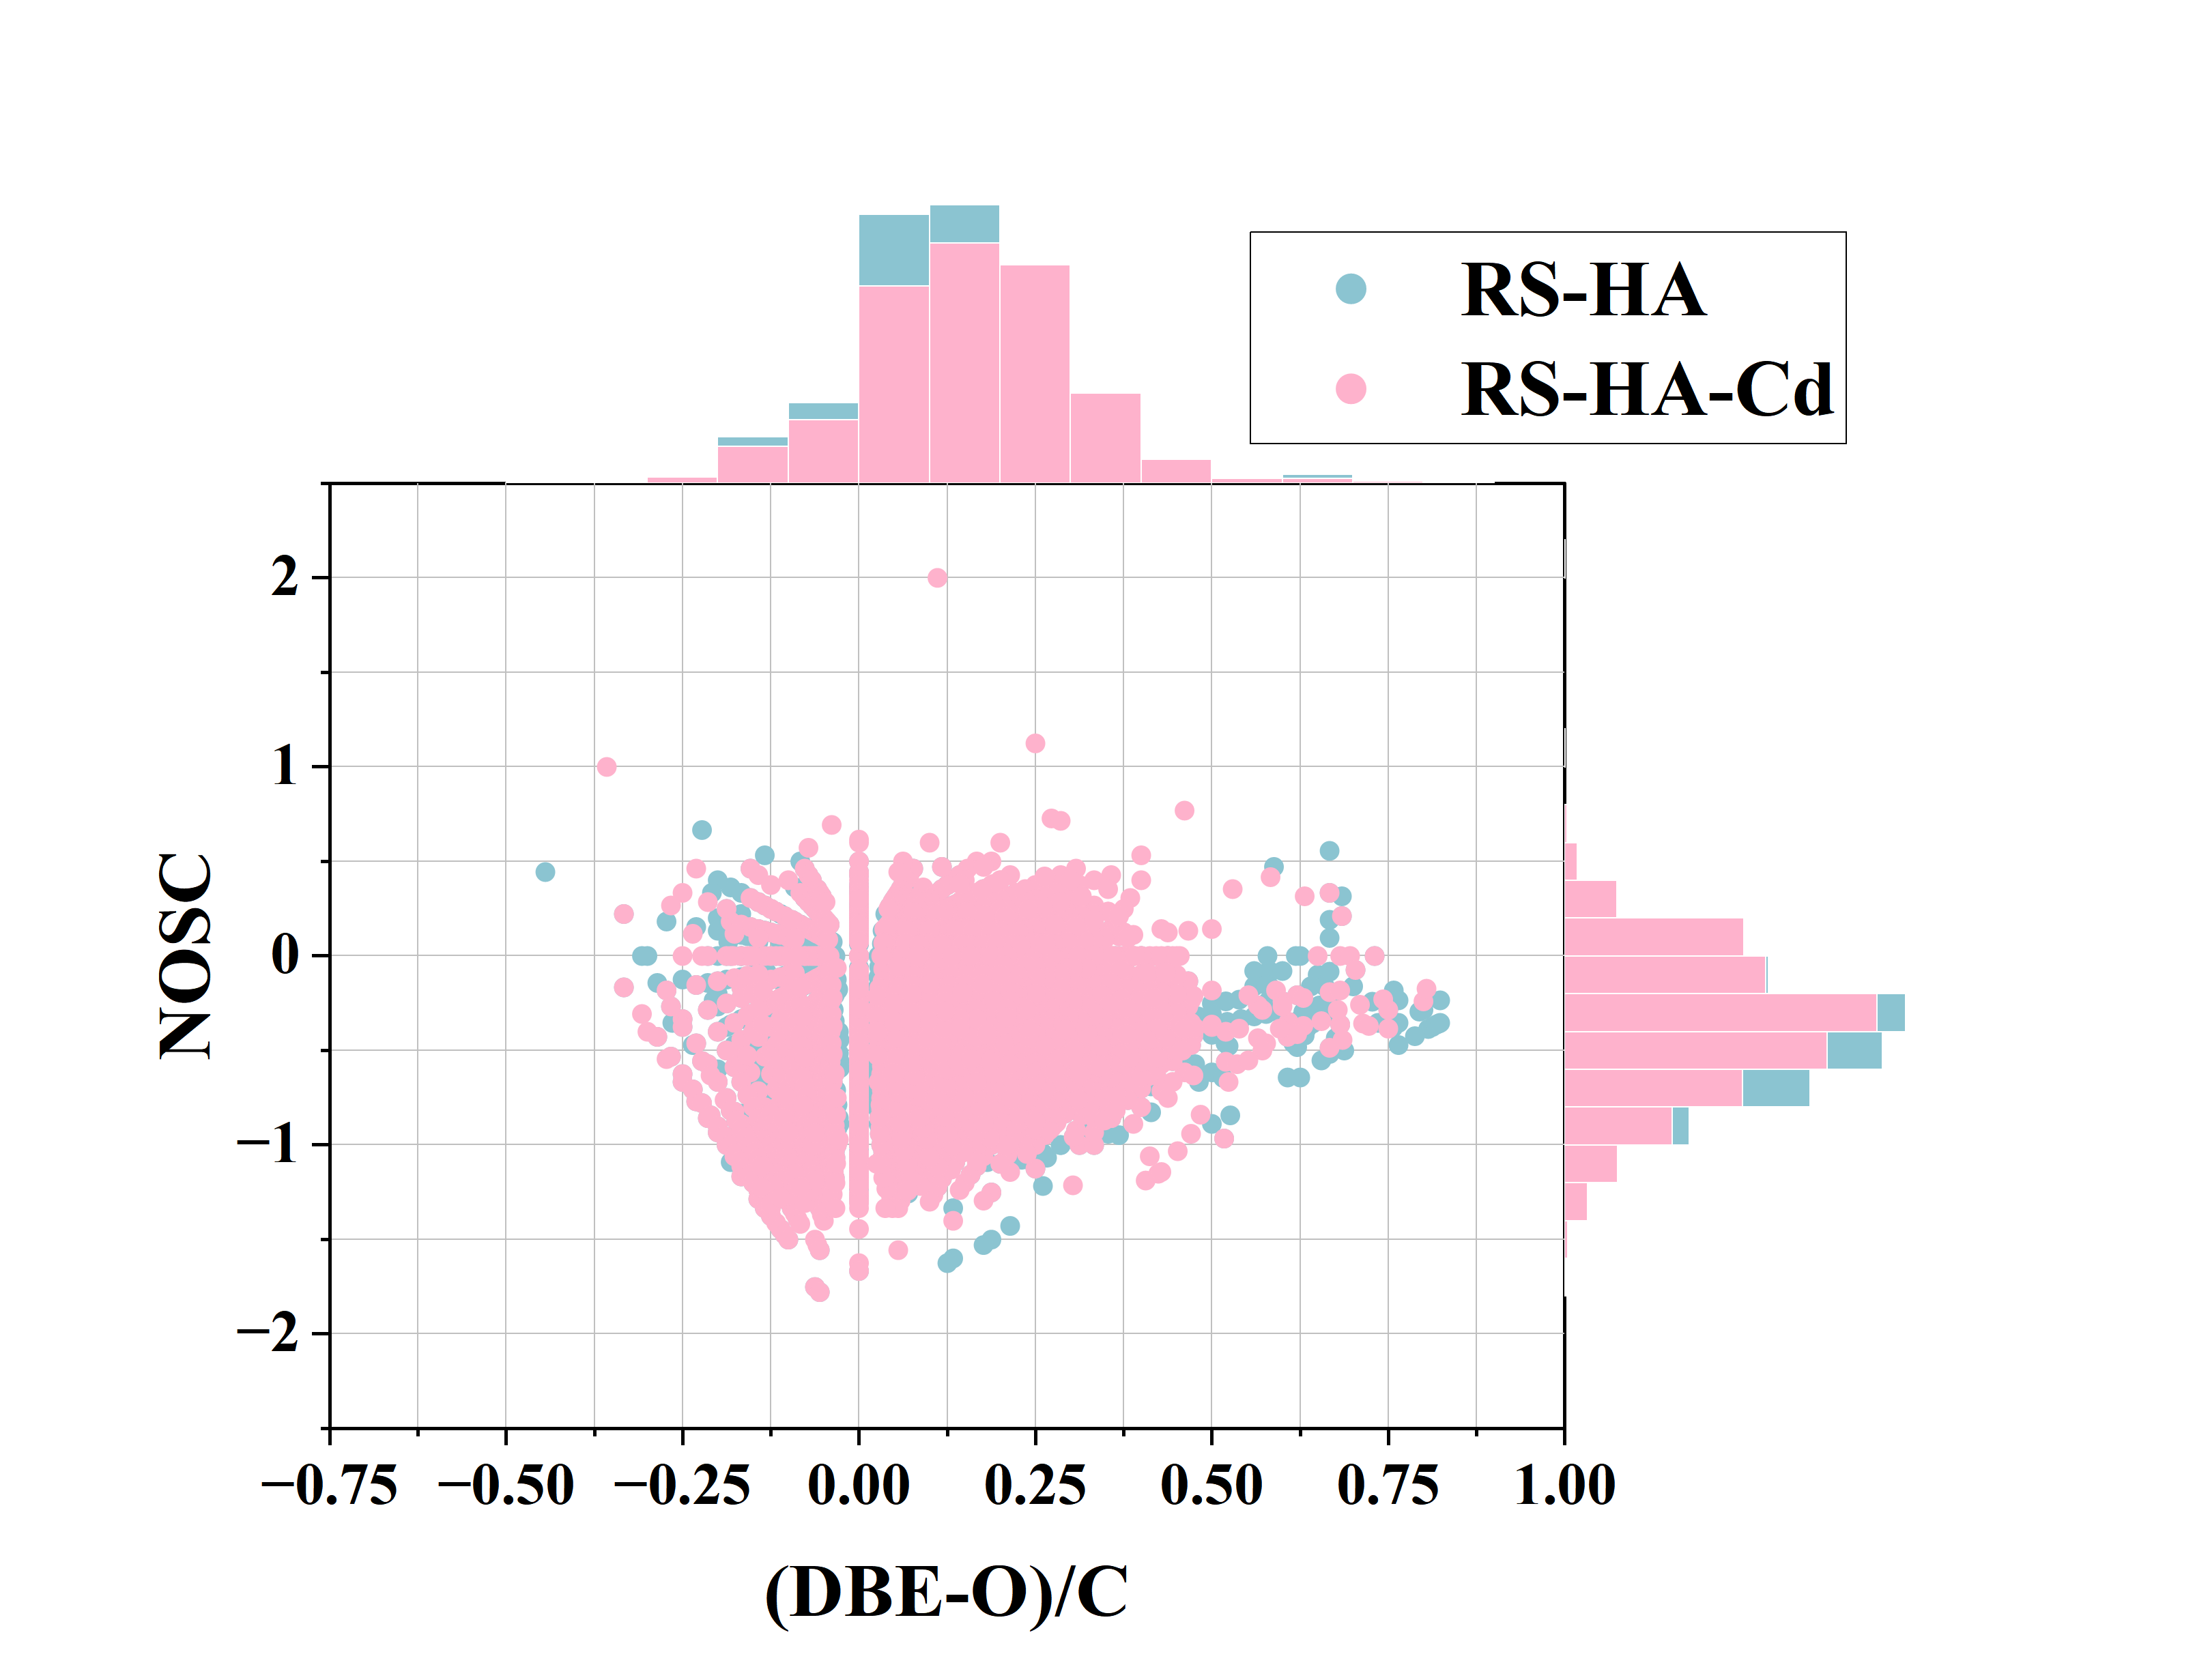

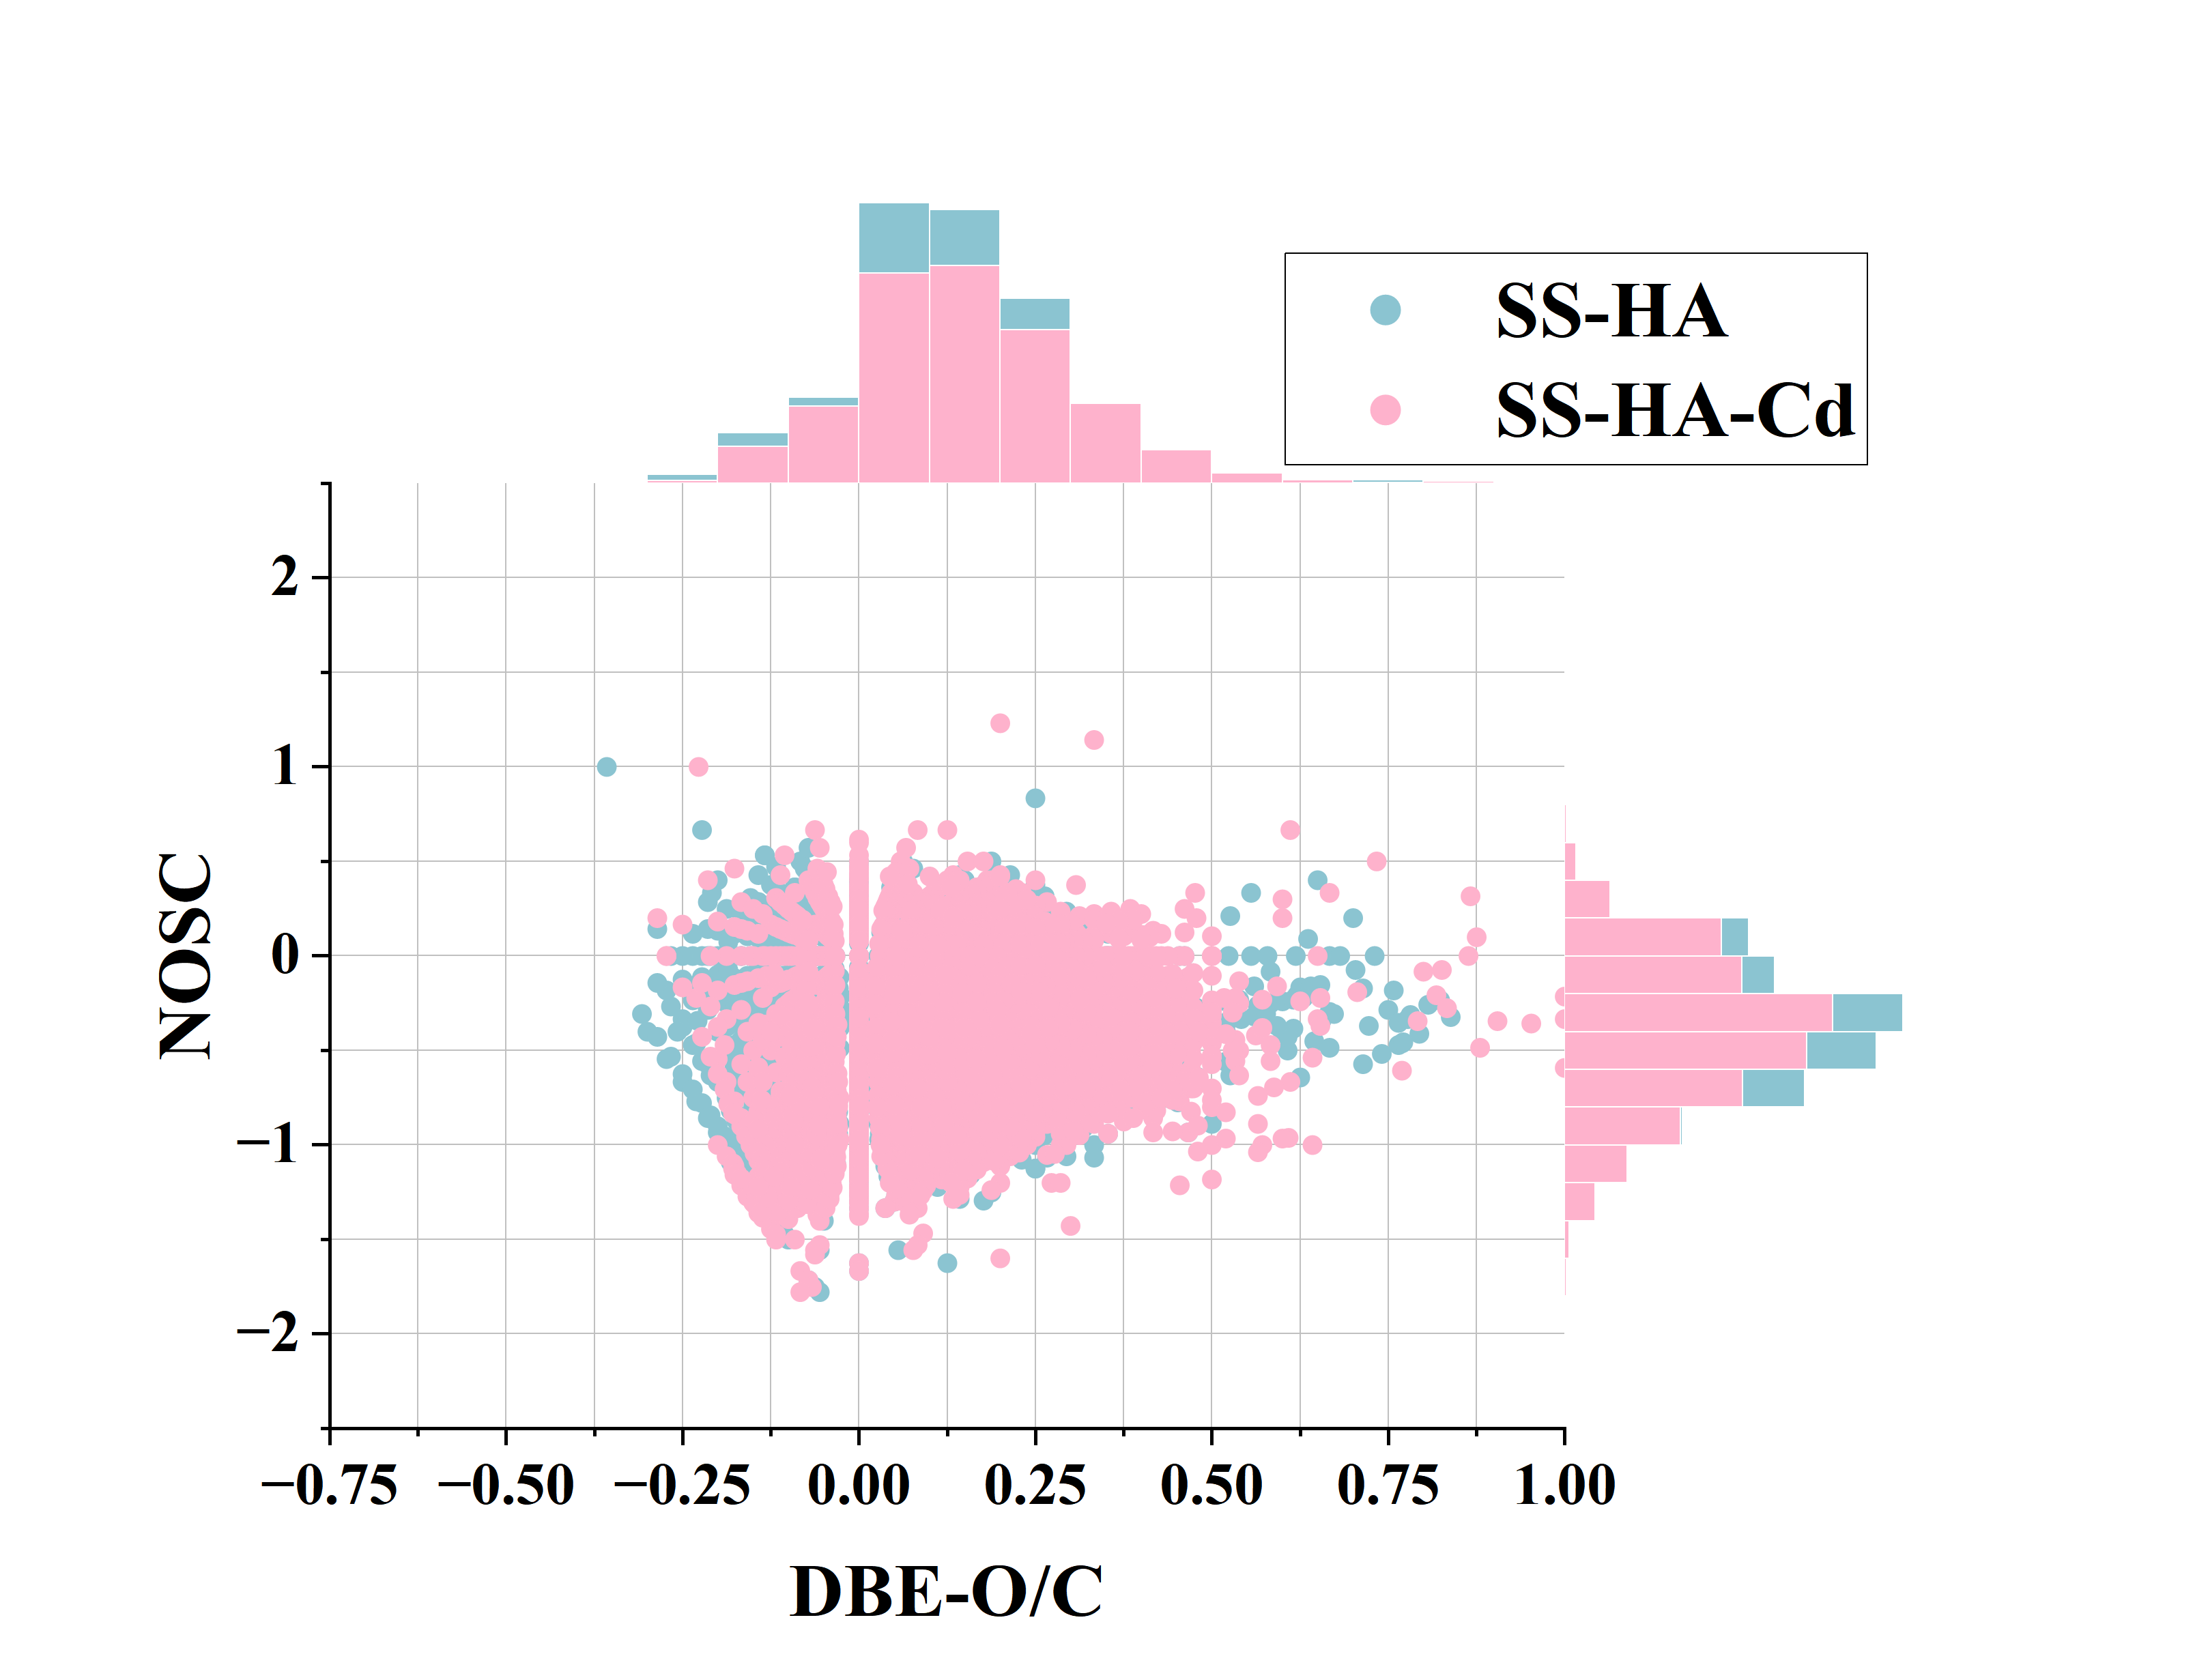


**Supplementary Fig. 10 | (DBE-O)/C vs. NOSC diagram of A-HA and A-HA-Cd.** The (DBE-O)/C index effectively differentiates the formation mechanisms of molecular unsaturation. A positive ratio indicates that the cyclic or conjugated structures of the carbon skeleton itself predominantly contribute to unsaturation, rather than modifications by oxygen-containing functional groups. Meanwhile, the positive/negative polarity of NOSC (Nominal Oxidation State of Carbon) distinctly reflects molecular redox states: positive values characterize electron-deficient oxidative features, while negative values represent electron-rich reductive properties.


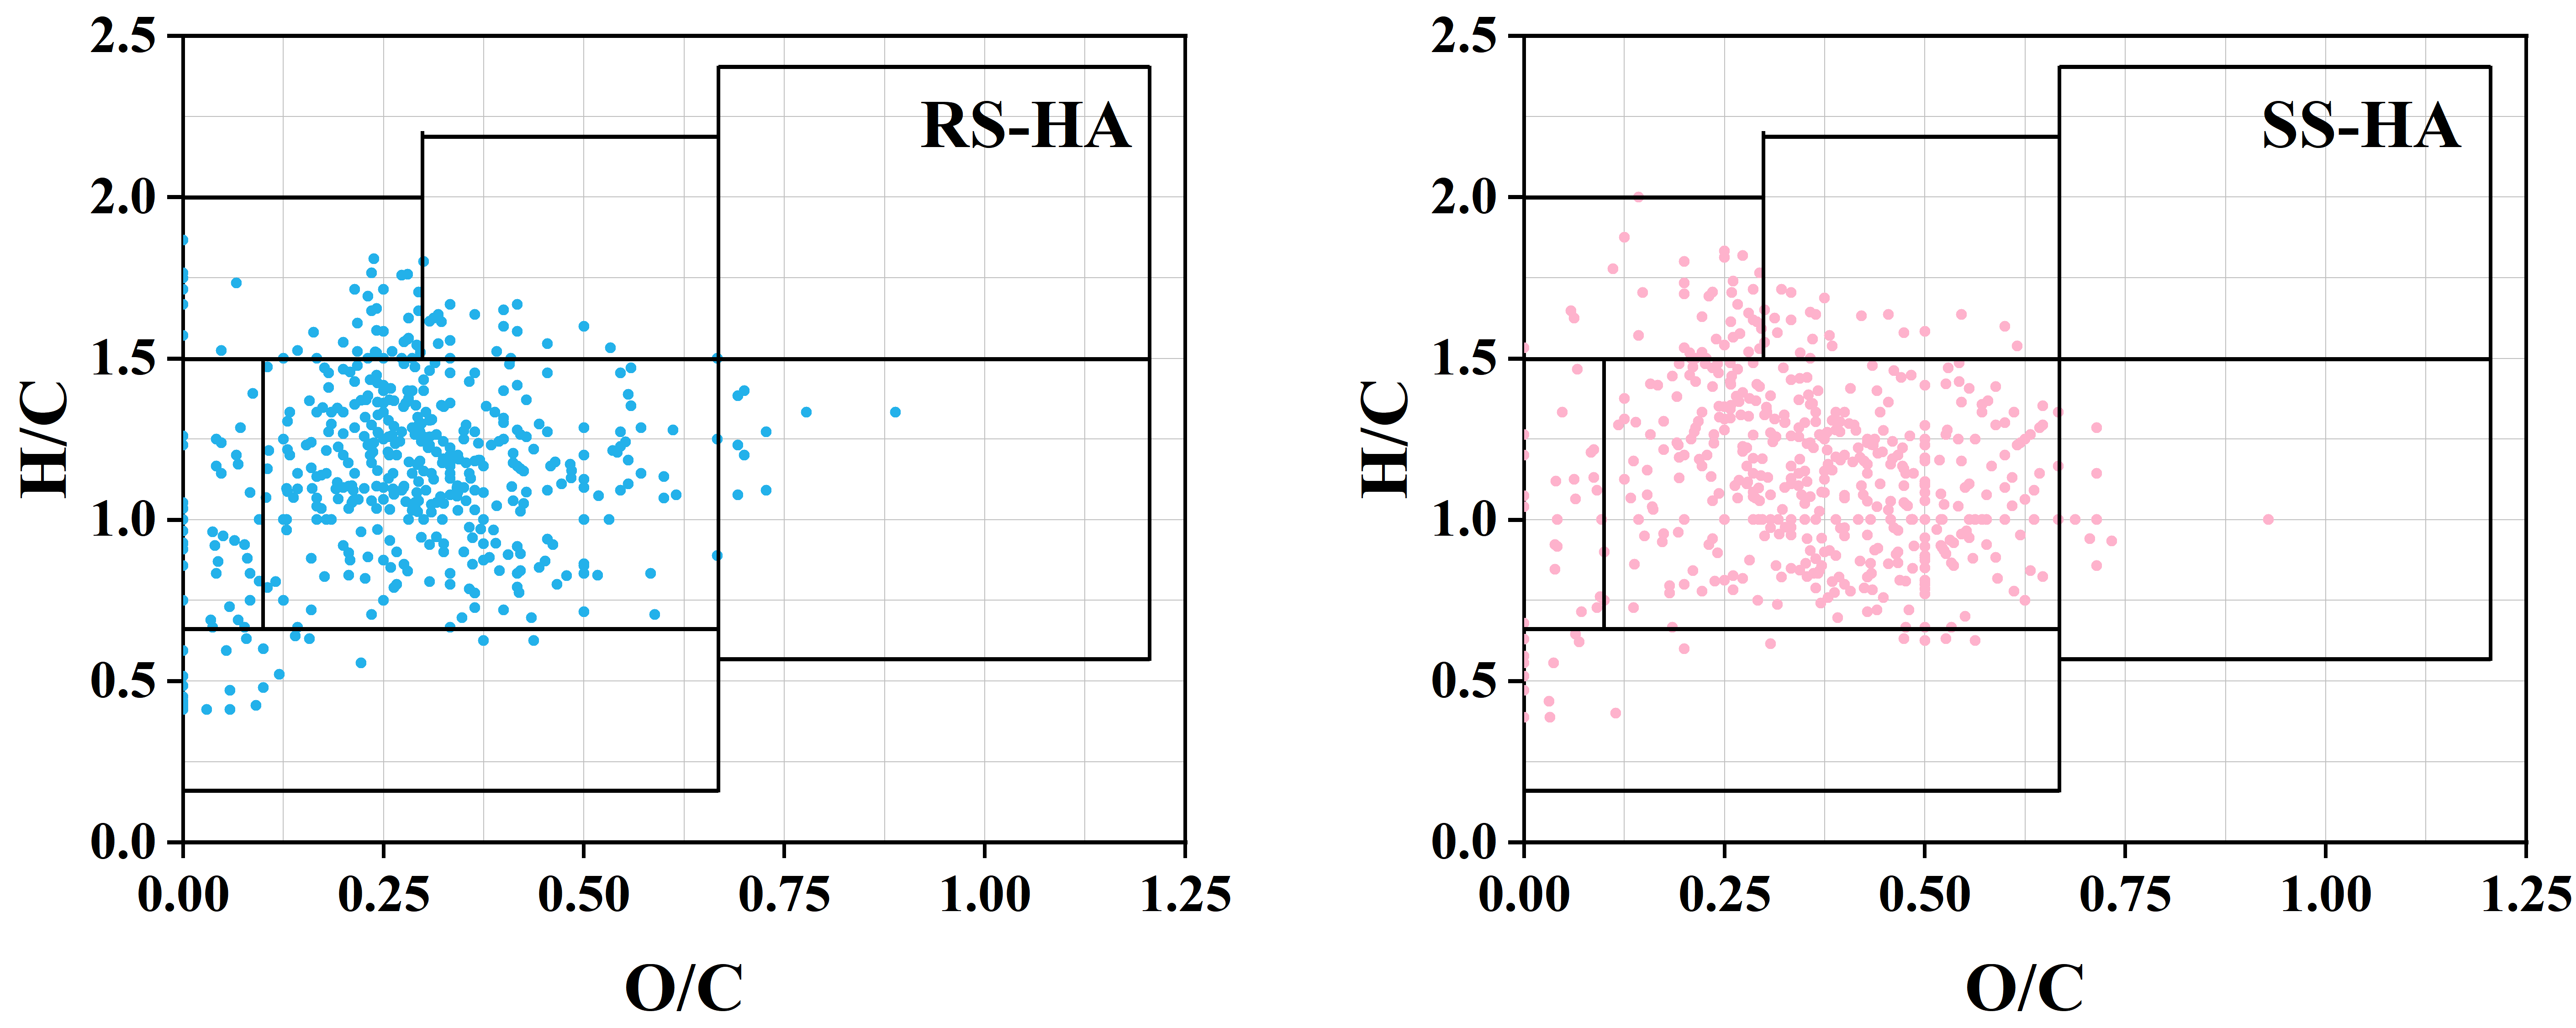


**Supplementary Fig. 11 | Van Krevelen plotted the distribution of unique molecular communities in RS-HA and SS-HA-Cd classified by elemental compounds.** Based on the stoichiometric ranges defined by Van Krevelen diagram classification (**Supplementary Table 11**),

**Supplementary Table 1. The characteristics of biochar at different pyrolysis temperatures**

|  | Elemental analysis % | | | | | Atomic molar ratio | | |
| --- | --- | --- | --- | --- | --- | --- | --- | --- |
| N | C | H | S | O | H/C | O/C | (O+N)/C |
| RS-HA | 2.91 | 60.55 | 5.72 | 0.05 | 30.77 | 0.095 | 0.51 | 0.56 |
| SS-HA | 3.82 | 58.06 | 5.70 | 0.15 | 32.27 | 0.10 | 0.56 | 0.62 |

**Supplementary Table 2. Kinetic model parameters.**

| Kinetic model | [Parameters](javascript:;) | Cd2+ concentration (mg/L) | |
| --- | --- | --- | --- |
| RS-HA | SS-HA |
| Pseudo-first-order | *k1* | 0.3533 | 0.2081 |
| *qe* (mg/g) | 3.2695 | 5.2209 |
| *R*2 | 0.9931 | 0.9948 |
| Pseudo-second-order | *k2* | 0.0381 | 0.0129 |
| *qe* (mg/g) | 5.5330 | 9.2093 |
| *R*2 | 0.9907 | 0.9938 |

**Supplementary Table 3.** Synchronous (ϕ) and asynchronous (ψ, in the brackets) maps of samples detected by 2D-COS data. “+”: positive sign; “-”: negative sign.

| Sample |  | HA | Tyr |
| --- | --- | --- | --- |
| RS-HA-Cd | HA | + | +- |
| Tyr | ++ | + |
| SS-HA-Cd | HA | + | ++ |
| Tyr | +- | + |

**Supplementary Table 4.** EXAFS fitting parameters at the Cd K-edge for various samples (set Ѕ02=0.7456).

|  | shell | CNa | Rb(Å) | σ2c(Å2) | ΔE0d(eV) | R factor |
| --- | --- | --- | --- | --- | --- | --- |
| Cd-foil | Cd-Cd | 12* | 2.89±0.06 | 0.0097 | 2.7±3.1 | 0.010 |
| SS-HA-Cd | Cd-N | 1.89±0.5 | 2.10±0.03 | 0.0039 | -9.0±1.0 | 0.009 |
| Cd-O | 3.17±0.8 | 2.23±0.05 | 0.0035 |  |  |
| Cd-S | 1.03±0.3 | 2.53±0.04 | 0.0053 |  |  |
| RS-HA-Cd | Cd-N | 2.73±0.6 | 2.11±0.04 | 0.0026 | -5.6±4.0 | 0.014 |
| Cd-O | 3.46±0.9 | 2.29±0.01 | 0.0052 |  |  |
| Cd-S | 1.39±0.3 | 2.59±0.02 | 0.0049 |  |  |

*aCN*: coordination numbers; *bR*: bond distance; *cσ*2: Debye-Waller factors; *d* Δ*E*0: the inner potential correction. R factor: goodness of fit. Error bounds that characterize the structural parameters obtained by EXAFS spectroscopy were estimated as CN±20%; R ± 1%; σ2 ± 20%.

**Supplementary Table 5.** FT-ICR MS-related indices.

| Named | RS-HA | | SS-HA | | RS-HA-Cd | | SS-HA-Cd | |
| --- | --- | --- | --- | --- | --- | --- | --- | --- |
| Count | Per | Count | Per | Count | Per | Count | Per |
| Total | 4568 | 1 | 4604 | 1 | 4227 | 1 | 3944 | 1 |
| CHOs | 2268 | 0.4965 | 2318 | 0.5035 | 2166 | 0.5124 | 2334 | 0.5918 |
| CHONs | 1984 | 0.4343 | 1983 | 0.4307 | 1908 | 0.4514 | 1524 | 0.3864 |
| CHOSs | 261 | 0.0571 | 256 | 0.0556 | 122 | 0.0289 | 62 | 0.0157 |
| CHONSs | 55 | 0.012 | 47 | 0.0102 | 31 | 0.0073 | 24 | 0.0061 |
| group1 | 44 | 0.0096 | 35 | 0.0076 | 51 | 0.0121 | 26 | 0.0066 |
| group2 | 478 | 0.1046 | 490 | 0.1064 | 671 | 0.1587 | 556 | 0.141 |
| group3 | 3585 | 0.7848 | 3619 | 0.7861 | 3085 | 0.7298 | 2885 | 0.7315 |
| group4 | 461 | 0.1009 | 460 | 0.0999 | 420 | 0.0994 | 477 | 0.1209 |
| CA | 41 | 0.009 | 31 | 0.0067 | 48 | 0.0114 | 23 | 0.0058 |
| LG | 3983 | 0.8719 | 4038 | 0.8771 | 3669 | 0.868 | 3373 | 0.8552 |
| TN | 14 | 0.0031 | 13 | 0.0028 | 16 | 0.0038 | 18 | 0.0046 |
| PL | 34 | 0.0074 | 153 | 0.0332 | 65 | 0.0154 | 50 | 0.0127 |
| CH | 129 | 0.0282 | 0 | 0 | 0 | 0 | 0 | 0 |
| AP | 298 | 0.0652 | 306 | 0.0665 | 354 | 0.0837 | 425 | 0.1078 |
| CRAM | 3047 | 0.667 | 3119 | 0.6775 | 2491 | 0.5893 | 2405 | 0.6098 |
| Cw | 23.89236 | 1 | 23.95131 | 1 | 24.26182 | 1 | 24.34567 | 1 |
| Hw | 28.10948 | 1.176505 | 28.12012 | 1.174054 | 27.86017 | 1.148313 | 29.0787 | 1.19441 |
| Ow | 8.252588 | 0.345407 | 8.409873 | 0.351124 | 8.018826 | 0.330512 | 7.987743 | 0.328097 |
| Nw | 0.269687 | 0.011288 | 0.264427 | 0.01104 | 0.333372 | 0.013741 | 0.236888 | 0.00973 |
| Sw | 0.02779 | 0.001163 | 0.027291 | 0.001139 | 0.038155 | 0.001573 | 0.034622 | 0.001422 |
| m/zw | 451.7022 | 18.90571 | 454.8463 | 18.99046 | 453.3686 | 18.6865 | 453.6416 | 18.63336 |
| DBEw | 10.97247 | 0.459246 | 11.02346 | 0.460245 | 11.49842 | 0.473931 | 10.92476 | 0.448735 |
| AI_modw | 0.33029 | 0.013824 | 0.329636 | 0.013763 | 0.352644 | 0.014535 | 0.322949 | 0.013265 |
| NOSCw | 0.45484 | 0.01904 | 0.44089 | 0.01841 | 0.44944 | 0.01852 | 0.52296 | 0.02148 |

**Supplementary Table 6.** Quantitative data of chemical reactions occurring in various compound categories.

|  | | Oxygenation | | | | | | Dealkylgroup | | | | | | Decarboxylation | | | | | | Deamiantion | | | | |  |
| --- | --- | --- | --- | --- | --- | --- | --- | --- | --- | --- | --- | --- | --- | --- | --- | --- | --- | --- | --- | --- | --- | --- | --- | --- | --- |
| CA | LG | LP | PA | TN | UH | CA | LG | LP | PA | TN | UH | CA | LG | LP | PA | TN | UH | CA | LG | LP | PA | TN | UH |
| RS-HA | CA | 1 |  |  |  |  |  |  |  |  |  |  |  |  |  |  |  |  |  |  |  |  |  |  |  |
| LG | 3 | 165 |  | 5 | 9 |  | 3 | 274 |  | 1 | 5 |  | 1 | 232 | 33 | 2 |  | 1 |  | 51 | 10 | 2 | 1 |  |
| LP |  | 1 |  | 2 |  |  |  | 3 | 1 |  |  |  |  |  | 20 |  |  |  |  |  | 9 |  |  |  |
| PA |  | 5 |  | 17 |  |  |  | 13 |  | 13 |  |  |  | 2 | 17 | 1 |  |  |  | 1 |  | 1 |  |  |
| TN |  |  |  |  | 1 |  |  |  |  |  |  |  |  | 7 |  |  | 1 |  |  |  |  |  |  |  |
| UH |  | 1 |  |  |  | 2 | 1 |  |  |  |  | 8 |  |  |  |  |  | 2 |  |  |  |  |  | 1 |
| SS-HA | CA |  | 1 | 2 |  |  |  | 2 |  |  |  |  |  | 3 | 1 |  |  |  |  |  |  |  |  |  |  |
| LG | 1 | 154 | 1 | 1 | 15 |  | 5 | 354 |  | 2 | 7 |  | 1 | 250 | 46 | 14 |  | 1 |  | 68 | 17 | 1 | 1 |  |
| LP |  | 1 | 7 | 3 |  |  |  | 23 | 8 | 21 | 5 |  |  | 1 | 21 |  |  |  |  |  | 28 |  |  |  |
| PA |  | 2 |  | 7 | 2 |  |  |  |  |  |  |  |  | 2 | 39 | 24 |  |  |  |  | 1 | 6 |  |  |
| TN |  |  |  |  |  |  |  |  |  |  |  |  |  |  |  |  | 1 |  |  |  |  |  |  |  |
| UH |  | 4 |  |  |  |  | 2 |  |  |  |  | 7 |  |  |  |  |  | 1 |  | 1 |  |  |  |  |

**Supplementary Table 7. Standard molar combustion enthalpy (ΔH) and NOSC of typical compound classes in the A-HA and A-HA-Cd.**

| Name | Compound class | NOSC | ΔH (kJ·mol-1 C) |
| --- | --- | --- | --- |
| RS-HA | Aliphatic | -1.01265 | -577.8414 |
| Condenesd aromatics | -0.20349 | -509.51036 |
| Lignin | -0.35863 | -508.69245 |
| Peptide-like | -0.66404 | -556.07256 |
| Tannin | 0.29381 | -441.81042 |
| SS-HA | Aliphatic | -1.01156 | -576.69528 |
| Condenesd aromatics | -0.18898 | -506.96874 |
| Lignin | -0.34356 | -506.97676 |
| Peptide-like | -0.72548 | -565.89283 |
| Tannin | 0.45334 | -424.66162 |
| RS-HA-Cd | Aliphatic | -1.05656 | -581.49838 |
| Condenesd aromatics | 0.1119 | -464.31473 |
| Lignin | -0.32783 | -504.22896 |
| Peptide-like | -0.78172 | -569.15858 |
| Tannin | 0.52658 | -411.69076 |
| SS-HA-Cd | Aliphatic | -1.07053 | -581.01346 |
| Condenesd aromatics | 0.09077 | -485.36638 |
| Lignin | -0.34048 | -503.43854 |
| Peptide-like | -0.83764 | -569.2675 |
| Tannin | 0.39727 | -414.83906 |

**Supplementary Table 8.** The number of BDOM categories of compounds in different treatments. RA, recalcitrant-active. RI, recalcitrant-inactive. LA, labile-active. LI, labile-inactive.

|  | LA | LI | RA | RI |
| --- | --- | --- | --- | --- |
| RS-HA | 348 | 17 | 3142 | 124 |
| SS-HA | 351 | 11 | 3187 | 109 |
| RS-HA-Cd | 296 | 18 | 2870 | 103 |
| SS-HA-Cd | 336 | 18 | 2710 | 78 |

**Supplementary Table 9. Parameters for topological analysis of A-HA-Cd molecular networks.**

|  | RS-HA-Cd | SS-HA-Cd |
| --- | --- | --- |
| Average node connectivity | 6.04 | 2.54 |
| Network diameter | 17.00 | 1.00 |
| Network radius | 9.00 | 0.00 |
| Characteristic path length | 6.05 | 5.88 |
| Clustering coefficient | 0.33 | 0.24 |
| Network density | 0.06 | 0.05 |
| Network heterogeneity | 0.86 | 0.53 |
| Network centralization | 0.14 | 0.05 |

**Supplementary Table 10. Stoichiometric ranges of the Van Krevelen diagram classifications.**

| Component classification | O/C | H/C | Abbreviation |
| --- | --- | --- | --- |
| Lipid-like | 0-0.3 | 1.5-2.0 | LP |
| Protein/amino sugar-like | 0.3-0.67 | 1.5-2.2 | PA |
| Carbohydrate-like | 0.67-1.2 | 1.5-2.4 | CH |
| Unsaturated hydrocarbons | 0-0.1 | 0.7-1.5 | UH |
| Lignin-like | 0.1-0.67 | 0.7-1.5 | LG |
| Tannins | 0.67-1.2 | 0.5-1.5 | TN |
| Condensed aromatic-like | 0-0.67 | 0.2-0.7 | CA |
| Unclassified compounds | - | - | UC |

**Supplementary References.**

1. Stedmon, C. A.; Bro, R., Characterizing dissolved organic matter fluorescence with parallel factor analysis: a tutorial. *Limnology and Oceanography: Methods* **2008,** *6*, (11), 572-579.

2. Yang, F.; Zhang, S.; Cheng, K.; Antonietti, M., A hydrothermal process to turn waste biomass into artificial fulvic and humic acids for soil remediation. *Science of the Total Environment* **2019,** *686*, 1140-1151.

3. Hu, Q.; Lou, M.; Wang, R.; Bai, S.; Guo, H.; Zhou, J.; Ma, Q.; Wang, T.; Zhu, L.; Zhang, X., Complexation with Metal Ions Affects Chlorination Reactivity of Dissolved Organic Matter: Structural Reactomics of Emerging Disinfection Byproducts. *Environmental Science & Technology* **2024,** *58*, (31), 13890-13903.

4. Kind, T.; Fiehn, O., Seven Golden Rules for heuristic filtering of molecular formulas obtained by accurate mass spectrometry. *BMC Bioinformatics* **2007,** *8*, (1), 105.

5. Bramer, L. M.; White, A. M.; Stratton, K. G.; Thompson, A. M.; Claborne, D.; Hofmockel, K.; McCue, L. A., ftmsRanalysis: An R package for exploratory data analysis and interactive visualization of FT-MS data. *PLOS Computational Biology* **2020,** *16*, (3), e1007654.

6. Koch, B. P.; Dittmar, T., From mass to structure: an aromaticity index for high-resolution mass data of natural organic matter. *Rapid Communications in Mass Spectrometry* **2006,** *20*, (5), 926-932.

7. LaRowe, D. E.; Van Cappellen, P., Degradation of natural organic matter: A thermodynamic analysis. *Geochimica et Cosmochimica Acta* **2011,** *75*, (8), 2030-2042.

8. Patel, S. A.; Erickson, L. E., Estimation of heats of combustion of biomass from elemental analysis using available electron concepts. *Biotechnology and Bioengineering* **1981,** *23*, (9), 2051-2067.

9. Battley, E. H., The development of direct and indirect methods for the study of the thermodynamics of microbial growth. *Thermochimica Acta* **1998,** *309*, (1), 17-37.

10. Popovic, M., Thermodynamic properties of microorganisms: determination and analysis of enthalpy, entropy, and Gibbs free energy of biomass, cells and colonies of 32 microorganism species. *Heliyon* **2019,** *5*, (6), e01950.

11. Noda, I., Two-dimensional codistribution spectroscopy to determine the sequential order of distributed presence of species. *Journal of Molecular Structure* **2014,** *1069*, 50-59.

12. Zhou, Z.; Huang, G.; Xiong, Y.; Zhou, M.; Zhang, S.; Tang, C. Y.; Meng, F., Unveiling the Susceptibility of Functional Groups of Poly(ether sulfone)/Polyvinylpyrrolidone Membranes to NaOCl: A Two-Dimensional Correlation Spectroscopic Study. *Environmental Science & Technology* **2017,** *51*, (24), 14342-14351.

13. Danczak, R. E.; Chu, R. K.; Fansler, S. J.; Goldman, A. E.; Graham, E. B.; Tfaily, M. M.; Toyoda, J.; Stegen, J. C., Using metacommunity ecology to understand environmental metabolomes. *Nature Communications* **2020,** *11*, (1), 6369.

14. Stegen, J. C.; Johnson, T.; Fredrickson, J. K.; Wilkins, M. J.; Konopka, A. E.; Nelson, W. C.; Arntzen, E. V.; Chrisler, W. B.; Chu, R. K.; Fansler, S. J.; Graham, E. B.; Kennedy, D. W.; Resch, C. T.; Tfaily, M.; Zachara, J., Influences of organic carbon speciation on hyporheic corridor biogeochemistry and microbial ecology. *Nature Communications* **2018,** *9*, (1), 585.

15. Wu, M.; Li, P.; Li, G.; Liu, K.; Gao, G.; Ma, S.; Qiu, C.; Li, Z., Using Potential Molecular Transformation To Understand the Molecular Trade-Offs in Soil Dissolved Organic Matter. *Environmental Science & Technology* **2022,** *56*, (16), 11827-11834.

16. Thompson, A. P.; Aktulga, H. M.; Berger, R.; Bolintineanu, D. S.; Brown, W. M.; Crozier, P. S.; In't Veld, P. J.; Kohlmeyer, A.; Moore, S. G.; Nguyen, T. D., LAMMPS-a flexible simulation tool for particle-based materials modeling at the atomic, meso, and continuum scales. *Computer Physics Communications* **2022,** *271*, 108171.

17. Berendsen, H. J.; Grigera, J.-R.; Straatsma, T. P., The missing term in effective pair potentials. *The Journal of Physical Chemistry* **1987,** *91*, (24), 6269-6271.

18. Li, P.; Roberts, B. P.; Chakravorty, D. K.; Merz Jr, K. M., Rational design of particle mesh Ewald compatible Lennard-Jones parameters for +2 metal cations in explicit solvent. *Journal of Chemical Theory and Computation* **2013,** *9*, (6), 2733-2748.

19. Li, P.; Song, L. F.; Merz Jr, K. M., Systematic parameterization of monovalent ions employing the nonbonded model. *Journal of Chemical Theory and Computation* **2015,** *11*, (4), 1645-1657.

20. Wang, J.; Wolf, R. M.; Caldwell, J. W.; Kollman, P. A.; Case, D. A., Development and testing of a general amber force field. *Journal of Computational Chemistry* **2004,** *25*, (9), 1157-1174.

21. Bayly, C. I.; Cieplak, P.; Cornell, W.; Kollman, P. A., A well-behaved electrostatic potential based method using charge restraints for deriving atomic charges: The RESP model. *The Journal of Physical Chemistry* **1993,** *97*, (40), 10269-10280.

22. Lu, T.; Chen, F., Multiwfn: A multifunctional wavefunction analyzer. *Journal of Computational Chemistry* **2012,** *33*, (5), 580-592.

23. Lu, T., A comprehensive electron wavefunction analysis toolbox for chemists, Multiwfn. *The Journal of Chemical Physics* **2024,** *161*, (8).

24. Hockney, R. W.; Eastwood, J. W., *Computer simulation using particles*. Taylor & Francis Group: New York, 1988.

25. Nosé, S., A unified formulation of the constant temperature molecular dynamics methods. *The Journal of Chemical Physics* **1984,** *81*, (1), 511-519.

26. Hoover, W. G., Canonical dynamics: Equilibrium phase-space distributions. *Physical Review A* **1985,** *31*, (3), 1695.

27. Humphrey, W.; Dalke, A.; Schulten, K., VMD: visual molecular dynamics. *Journal of molecular graphics* **1996,** *14*, (1), 33-38.

1.  Corresponding author.

   Prof. Kui Cheng, [chengkui@neau.edu.cn](mailto:chengkui@neau.edu.cn)

   Prof. Fan Yang, yangfan_neau@163.com

   Prof. Liu Cui, liucui@ncepu.edu.cn [↑](#footnote-ref-2)
